# Supplementary material
Source: publisher figshare collection journal article supplement (https://tandf.figshare.com/ndownloader/files/35920300)
Supplement: Supplementary file 1 [file 35920300]

## Sheet: FileGuide
This file includes the results of the Duncan's test.
We conducted multiple pairwise comparison experiments with the same work transfer allocation against each other (Equal WT) and then we compared experiments with the same variability transfer allocation against each other (Equal VT).
The following sheets are included in this file:
SHEET NAME	DESCRIPTION
TH_YXY_ComparingEqualVTexperime	Duncan's test comparing experiments with equal VT in terms of throughput (TH), YXY configuration
TH_YXY_ComparingEqualWTexperime	Duncan's test comparing experiments with equal WT in terms of throughput (TH), YXY configuration
IDSCV_YXY_ComparingEqualVTexper	Duncan's test comparing experiments with equal VT in terms of inter-departure time squared coefficient of variation (IDSCV), YXY configuration
IDSCV_YXY_ComparingEqualWTexper	Duncan's test comparing experiments with equal WT in terms of inter-departure time squared coefficient of variation (IDSCV), YXY configuration
TA_YXY_ComparingEqualWTexperime	Duncan's test comparing experiments with equal WT in terms of the total time spent in the assembly station (TA), YXY configuration
TH_XYY_ComparingEqualVTexperime	Duncan's test comparing experiments with equal VT in terms of throughput (TH), XYY configuration
TH_XYY_ComparingEqualWTexperime	Duncan's test comparing experiments with equal WT in terms of throughput (TH), XYY configuration
IDSCV_XYY_ComparingEqualVTexper	Duncan's test comparing experiments with equal VT in terms of inter-departure time squared coefficient of variation (IDSCV), XYY configuration
IDSCV_XYY_ComparingEqualWTexper	Duncan's test comparing experiments with equal WT in terms of inter-departure time squared coefficient of variation (IDSCV), XYY configuration
TA_XYY_ComparingEqualWTexperime	Duncan's test comparing experiments with equal WT in terms of the total time spent in the assembly station (TA), XYY configuration

## Sheet: TH_YXY_ComparingEqualVTexperime
mean	group Duncan test	MeanA	Var1	Var2	VarA	SumVar
0.598026	a	0.8	1	1	1	3
0.597547	a	0.9	1	1	1	3
0.595067	ab	0.7	1	1	1	3
0.593407	ab	1	1	1	1	3
0.589236	abc	0.6	1	1	1	3
0.585132	bc	1.1	1	1	1	3
0.582465	cd	0.5	1	1	1	3
0.574408	de	0.4	1	1	1	3
0.573112	de	1.2	1	1	1	3
0.565312	ef	0.3	1	1	1	3
0.557202	fg	1.3	1	1	1	3
0.556516	fg	0.2	1	1	1	3
0.54856	gh	0.1	1	1	1	3
0.540079	h	1.4	1	1	1	3
0.519563	i	1.5	1	1	1	3
0.49997	j	1.6	1	1	1	3
0.478776	k	1.7	1	1	1	3
0.457902	l	1.8	1	1	1	3
0.43686	m	1.9	1	1	1	3
0.594559	a	0.8	1.5	1.5	0	3
0.593174	a	0.9	1.5	1.5	0	3
0.590857	a	0.7	1.5	1.5	0	3
0.585336	a	1	1.5	1.5	0	3
0.582648	ab	0.6	1.5	1.5	0	3
0.572005	b	1.1	1.5	1.5	0	3
0.570649	b	0.5	1.5	1.5	0	3
0.558716	c	0.4	1.5	1.5	0	3
0.55473	cd	1.2	1.5	1.5	0	3
0.545661	de	0.3	1.5	1.5	0	3
0.535227	ef	1.3	1.5	1.5	0	3
0.533011	f	0.2	1.5	1.5	0	3
0.52045	g	0.1	1.5	1.5	0	3
0.51516	g	1.4	1.5	1.5	0	3
0.493675	h	1.5	1.5	1.5	0	3
0.471865	i	1.6	1.5	1.5	0	3
0.450954	j	1.7	1.5	1.5	0	3
0.430294	k	1.8	1.5	1.5	0	3
0.410527	l	1.9	1.5	1.5	0	3
0.641293	a	1	0	1.5	1.5	3
0.640399	a	0.9	0	1.5	1.5	3
0.637859	ab	1.1	0	1.5	1.5	3
0.637232	ab	0.8	0	1.5	1.5	3
0.630036	abc	0.7	0	1.5	1.5	3
0.627797	bc	1.2	0	1.5	1.5	3
0.622334	cd	0.6	0	1.5	1.5	3
0.614225	de	1.3	0	1.5	1.5	3
0.613073	de	0.5	0	1.5	1.5	3
0.603692	ef	0.4	0	1.5	1.5	3
0.594195	fg	0.3	0	1.5	1.5	3
0.594087	fg	1.4	0	1.5	1.5	3
0.583959	gh	0.2	0	1.5	1.5	3
0.575903	hi	0.1	0	1.5	1.5	3
0.571126	i	1.5	0	1.5	1.5	3
0.54776	j	1.6	0	1.5	1.5	3
0.523424	k	1.7	0	1.5	1.5	3
0.499294	l	1.8	0	1.5	1.5	3
0.475476	m	1.9	0	1.5	1.5	3
0.5889	a	0.8	1.25	1.25	0.5	3
0.588238	a	0.9	1.25	1.25	0.5	3
0.585416	a	0.7	1.25	1.25	0.5	3
0.582697	ab	1	1.25	1.25	0.5	3
0.579436	abc	0.6	1.25	1.25	0.5	3
0.573566	bc	1.1	1.25	1.25	0.5	3
0.57089	cd	0.5	1.25	1.25	0.5	3
0.56159	de	0.4	1.25	1.25	0.5	3
0.559819	e	1.2	1.25	1.25	0.5	3
0.551656	ef	0.3	1.25	1.25	0.5	3
0.5432	f	1.3	1.25	1.25	0.5	3
0.541246	fg	0.2	1.25	1.25	0.5	3
0.531848	gh	0.1	1.25	1.25	0.5	3
0.524498	h	1.4	1.25	1.25	0.5	3
0.504087	i	1.5	1.25	1.25	0.5	3
0.483806	j	1.6	1.25	1.25	0.5	3
0.462706	k	1.7	1.25	1.25	0.5	3
0.442139	l	1.8	1.25	1.25	0.5	3
0.421843	m	1.9	1.25	1.25	0.5	3
0.612303	a	0.9	0.5	1.25	1.25	3
0.611252	ab	0.8	0.5	1.25	1.25	3
0.609459	ab	1	0.5	1.25	1.25	3
0.607259	ab	0.7	0.5	1.25	1.25	3
0.602241	abc	1.1	0.5	1.25	1.25	3
0.601053	bcd	0.6	0.5	1.25	1.25	3
0.593609	cde	0.5	0.5	1.25	1.25	3
0.591422	de	1.2	0.5	1.25	1.25	3
0.585187	ef	0.4	0.5	1.25	1.25	3
0.577218	fg	1.3	0.5	1.25	1.25	3
0.576354	fg	0.3	0.5	1.25	1.25	3
0.567444	gh	0.2	0.5	1.25	1.25	3
0.559762	h	0.1	0.5	1.25	1.25	3
0.559294	h	1.4	0.5	1.25	1.25	3
0.539135	i	1.5	0.5	1.25	1.25	3
0.518637	j	1.6	0.5	1.25	1.25	3
0.497619	k	1.7	0.5	1.25	1.25	3
0.475505	l	1.8	0.5	1.25	1.25	3
0.453875	m	1.9	0.5	1.25	1.25	3
0.752008	a	0.9	0.333333	0.333333	0.333333	1
0.75159	a	1	0.333333	0.333333	0.333333	1
0.743747	ab	0.8	0.333333	0.333333	0.333333	1
0.740686	ab	1.1	0.333333	0.333333	0.333333	1
0.729665	bc	0.7	0.333333	0.333333	0.333333	1
0.720282	c	1.2	0.333333	0.333333	0.333333	1
0.711914	c	0.6	0.333333	0.333333	0.333333	1
0.692778	d	0.5	0.333333	0.333333	0.333333	1
0.691515	d	1.3	0.333333	0.333333	0.333333	1
0.673952	e	0.4	0.333333	0.333333	0.333333	1
0.660201	ef	1.4	0.333333	0.333333	0.333333	1
0.655403	f	0.3	0.333333	0.333333	0.333333	1
0.637707	g	0.2	0.333333	0.333333	0.333333	1
0.626909	g	1.5	0.333333	0.333333	0.333333	1
0.621839	g	0.1	0.333333	0.333333	0.333333	1
0.594477	h	1.6	0.333333	0.333333	0.333333	1
0.563407	i	1.7	0.333333	0.333333	0.333333	1
0.534605	j	1.8	0.333333	0.333333	0.333333	1
0.507304	k	1.9	0.333333	0.333333	0.333333	1
0.751249	a	0.9	0.5	0.5	0	1
0.749484	a	1	0.5	0.5	0	1
0.740606	ab	0.8	0.5	0.5	0	1
0.733847	ab	1.1	0.5	0.5	0	1
0.721088	bc	0.7	0.5	0.5	0	1
0.707648	cd	1.2	0.5	0.5	0	1
0.699913	d	0.6	0.5	0.5	0	1
0.678548	e	0.5	0.5	0.5	0	1
0.676405	e	1.3	0.5	0.5	0	1
0.659032	ef	0.4	0.5	0.5	0	1
0.643035	f	1.4	0.5	0.5	0	1
0.639655	fg	0.3	0.5	0.5	0	1
0.621678	gh	0.2	0.5	0.5	0	1
0.609674	h	1.5	0.5	0.5	0	1
0.604407	h	0.1	0.5	0.5	0	1
0.577387	i	1.6	0.5	0.5	0	1
0.547424	j	1.7	0.5	0.5	0	1
0.518732	k	1.8	0.5	0.5	0	1
0.492369	l	1.9	0.5	0.5	0	1
0.774281	a	1	0	0.5	0.5	1
0.771191	a	0.9	0	0.5	0.5	1
0.766788	a	1.1	0	0.5	0.5	1
0.759854	ab	0.8	0	0.5	0.5	1
0.746725	b	1.2	0	0.5	0.5	1
0.743863	bc	0.7	0	0.5	0.5	1
0.725235	cd	0.6	0	0.5	0.5	1
0.716299	de	1.3	0	0.5	0.5	1
0.705079	e	0.5	0	0.5	0.5	1
0.685601	f	0.4	0	0.5	0.5	1
0.680021	f	1.4	0	0.5	0.5	1
0.667001	fg	0.3	0	0.5	0.5	1
0.649667	gh	0.2	0	0.5	0.5	1
0.643498	h	1.5	0	0.5	0.5	1
0.634145	h	0.1	0	0.5	0.5	1
0.607719	i	1.6	0	0.5	0.5	1
0.574644	j	1.7	0	0.5	0.5	1
0.543841	k	1.8	0	0.5	0.5	1
0.515854	l	1.9	0	0.5	0.5	1
0.749287	a	0.9	0.416667	0.416667	0.166667	1
0.747937	a	1	0.416667	0.416667	0.166667	1
0.740727	ab	0.8	0.416667	0.416667	0.166667	1
0.735017	ab	1.1	0.416667	0.416667	0.166667	1
0.725595	bc	0.7	0.416667	0.416667	0.166667	1
0.712457	c	1.2	0.416667	0.416667	0.166667	1
0.706904	c	0.6	0.416667	0.416667	0.166667	1
0.686885	d	0.5	0.416667	0.416667	0.166667	1
0.683224	de	1.3	0.416667	0.416667	0.166667	1
0.667027	ef	0.4	0.416667	0.416667	0.166667	1
0.650419	fg	1.4	0.416667	0.416667	0.166667	1
0.647462	g	0.3	0.416667	0.416667	0.166667	1
0.629067	h	0.2	0.416667	0.416667	0.166667	1
0.618036	h	1.5	0.416667	0.416667	0.166667	1
0.612146	h	0.1	0.416667	0.416667	0.166667	1
0.585654	i	1.6	0.416667	0.416667	0.166667	1
0.555506	j	1.7	0.416667	0.416667	0.166667	1
0.5264	k	1.8	0.416667	0.416667	0.166667	1
0.499591	l	1.9	0.416667	0.416667	0.166667	1
0.760485	a	1	0.166667	0.416667	0.416667	1
0.759138	a	0.9	0.166667	0.416667	0.416667	1
0.751202	ab	1.1	0.166667	0.416667	0.416667	1
0.749757	ab	0.8	0.166667	0.416667	0.416667	1
0.734918	bc	0.7	0.166667	0.416667	0.416667	1
0.732345	bc	1.2	0.166667	0.416667	0.416667	1
0.717048	cd	0.6	0.166667	0.416667	0.416667	1
0.704081	de	1.3	0.166667	0.416667	0.416667	1
0.698228	e	0.5	0.166667	0.416667	0.416667	1
0.679019	f	0.4	0.166667	0.416667	0.416667	1
0.671626	f	1.4	0.166667	0.416667	0.416667	1
0.660478	fg	0.3	0.166667	0.416667	0.416667	1
0.643202	gh	0.2	0.166667	0.416667	0.416667	1
0.637765	h	1.5	0.166667	0.416667	0.416667	1
0.627413	h	0.1	0.166667	0.416667	0.416667	1
0.60374	i	1.6	0.166667	0.416667	0.416667	1
0.5722	j	1.7	0.166667	0.416667	0.416667	1
0.542142	k	1.8	0.166667	0.416667	0.416667	1
0.514973	l	1.9	0.166667	0.416667	0.416667	1
0.466806	a	0.5	2.66667	2.66667	2.66667	8
0.466379	a	0.6	2.66667	2.66667	2.66667	8
0.465774	a	0.4	2.66667	2.66667	2.66667	8
0.465532	a	0.7	2.66667	2.66667	2.66667	8
0.463408	ab	0.3	2.66667	2.66667	2.66667	8
0.462725	ab	0.8	2.66667	2.66667	2.66667	8
0.461026	ab	0.2	2.66667	2.66667	2.66667	8
0.459102	b	0.1	2.66667	2.66667	2.66667	8
0.458649	b	0.9	2.66667	2.66667	2.66667	8
0.453052	c	1	2.66667	2.66667	2.66667	8
0.445579	d	1.1	2.66667	2.66667	2.66667	8
0.43675	e	1.2	2.66667	2.66667	2.66667	8
0.426187	f	1.3	2.66667	2.66667	2.66667	8
0.414333	g	1.4	2.66667	2.66667	2.66667	8
0.402428	h	1.5	2.66667	2.66667	2.66667	8
0.389332	i	1.6	2.66667	2.66667	2.66667	8
0.376011	j	1.7	2.66667	2.66667	2.66667	8
0.362087	k	1.8	2.66667	2.66667	2.66667	8
0.348147	l	1.9	2.66667	2.66667	2.66667	8
0.457593	a	0.7	4	4	0	8
0.457565	a	0.6	4	4	0	8
0.455114	ab	0.8	4	4	0	8
0.454147	ab	0.5	4	4	0	8
0.44874	b	0.9	4	4	0	8
0.448263	b	0.4	4	4	0	8
0.440685	c	1	4	4	0	8
0.44064	c	0.3	4	4	0	8
0.432999	d	0.2	4	4	0	8
0.430413	de	1.1	4	4	0	8
0.425257	ef	0.1	4	4	0	8
0.418557	f	1.2	4	4	0	8
0.40545	g	1.3	4	4	0	8
0.391828	h	1.4	4	4	0	8
0.378724	i	1.5	4	4	0	8
0.364913	j	1.6	4	4	0	8
0.351734	k	1.7	4	4	0	8
0.337459	l	1.8	4	4	0	8
0.323746	m	1.9	4	4	0	8
0.529307	a	0.9	0	4	4	8
0.528755	a	0.8	0	4	4	8
0.527927	a	1	0	4	4	8
0.527756	a	0.7	0	4	4	8
0.525077	ab	0.6	0	4	4	8
0.52431	abc	1.1	0	4	4	8
0.52176	abc	0.5	0	4	4	8
0.518122	bcd	0.4	0	4	4	8
0.517391	cd	1.2	0	4	4	8
0.514177	de	0.3	0	4	4	8
0.509328	ef	0.2	0	4	4	8
0.508626	ef	1.3	0	4	4	8
0.505356	f	0.1	0	4	4	8
0.498468	g	1.4	0	4	4	8
0.485367	h	1.5	0	4	4	8
0.471154	i	1.6	0	4	4	8
0.454768	j	1.7	0	4	4	8
0.437823	k	1.8	0	4	4	8
0.421279	l	1.9	0	4	4	8
0.450659	a	0.6	3.33333	3.33333	1.33333	8
0.4499	ab	0.5	3.33333	3.33333	1.33333	8
0.449796	ab	0.7	3.33333	3.33333	1.33333	8
0.448001	ab	0.8	3.33333	3.33333	1.33333	8
0.447441	ab	0.4	3.33333	3.33333	1.33333	8
0.444457	abc	0.3	3.33333	3.33333	1.33333	8
0.444003	bc	0.9	3.33333	3.33333	1.33333	8
0.441438	c	0.2	3.33333	3.33333	1.33333	8
0.438765	c	0.1	3.33333	3.33333	1.33333	8
0.438501	c	1	3.33333	3.33333	1.33333	8
0.43081	d	1.1	3.33333	3.33333	1.33333	8
0.420807	e	1.2	3.33333	3.33333	1.33333	8
0.409986	f	1.3	3.33333	3.33333	1.33333	8
0.398909	g	1.4	3.33333	3.33333	1.33333	8
0.386619	h	1.5	3.33333	3.33333	1.33333	8
0.373485	i	1.6	3.33333	3.33333	1.33333	8
0.360448	j	1.7	3.33333	3.33333	1.33333	8
0.34805	k	1.8	3.33333	3.33333	1.33333	8
0.334382	l	1.9	3.33333	3.33333	1.33333	8
0.484166	a	0.6	1.33333	3.33333	3.33333	8
0.483694	ab	0.5	1.33333	3.33333	3.33333	8
0.483184	abc	0.7	1.33333	3.33333	3.33333	8
0.481866	abc	0.4	1.33333	3.33333	3.33333	8
0.48165	abc	0.8	1.33333	3.33333	3.33333	8
0.479802	abcd	0.3	1.33333	3.33333	3.33333	8
0.477827	bcde	0.2	1.33333	3.33333	3.33333	8
0.477393	cde	0.9	1.33333	3.33333	3.33333	8
0.474726	de	0.1	1.33333	3.33333	3.33333	8
0.472787	e	1	1.33333	3.33333	3.33333	8
0.465936	f	1.1	1.33333	3.33333	3.33333	8
0.457165	g	1.2	1.33333	3.33333	3.33333	8
0.447537	h	1.3	1.33333	3.33333	3.33333	8
0.435844	i	1.4	1.33333	3.33333	3.33333	8
0.422754	j	1.5	1.33333	3.33333	3.33333	8
0.410529	k	1.6	1.33333	3.33333	3.33333	8
0.39644	l	1.7	1.33333	3.33333	3.33333	8
0.382217	m	1.8	1.33333	3.33333	3.33333	8
0.36745	n	1.9	1.33333	3.33333	3.33333	8
0.635702	a	1	0	2	1	3
0.633982	ab	0.9	0	2	1	3
0.631142	abc	1.1	0	2	1	3
0.628646	abc	0.8	0	2	1	3
0.621112	bcd	1.2	0	2	1	3
0.620221	cd	0.7	0	2	1	3
0.610623	de	0.6	0	2	1	3
0.603871	e	1.3	0	2	1	3
0.59966	ef	0.5	0	2	1	3
0.589105	fg	0.4	0	2	1	3
0.583724	g	1.4	0	2	1	3
0.578223	gh	0.3	0	2	1	3
0.567921	hi	0.2	0	2	1	3
0.560349	i	1.5	0	2	1	3
0.558499	i	0.1	0	2	1	3
0.535757	j	1.6	0	2	1	3
0.511011	k	1.7	0	2	1	3
0.487576	l	1.8	0	2	1	3
0.463852	m	1.9	0	2	1	3
0.773852	a	1	0	0.666667	0.333333	1
0.769565	a	0.9	0	0.666667	0.333333	1
0.763986	a	1.1	0	0.666667	0.333333	1
0.75685	ab	0.8	0	0.666667	0.333333	1
0.741653	b	1.2	0	0.666667	0.333333	1
0.739355	b	0.7	0	0.666667	0.333333	1
0.71891	c	0.6	0	0.666667	0.333333	1
0.70835	cd	1.3	0	0.666667	0.333333	1
0.698221	d	0.5	0	0.666667	0.333333	1
0.677829	e	0.4	0	0.666667	0.333333	1
0.672159	e	1.4	0	0.666667	0.333333	1
0.658356	ef	0.3	0	0.666667	0.333333	1
0.63953	fg	0.2	0	0.666667	0.333333	1
0.635469	g	1.5	0	0.666667	0.333333	1
0.623489	g	0.1	0	0.666667	0.333333	1
0.600192	h	1.6	0	0.666667	0.333333	1
0.567391	i	1.7	0	0.666667	0.333333	1
0.537394	j	1.8	0	0.666667	0.333333	1
0.509442	k	1.9	0	0.666667	0.333333	1
0.517508	a	0.9	0	5.33333	2.66667	8
0.517212	a	1	0	5.33333	2.66667	8
0.516035	a	0.8	0	5.33333	2.66667	8
0.514036	ab	0.7	0	5.33333	2.66667	8
0.513427	ab	1.1	0	5.33333	2.66667	8
0.51021	abc	0.6	0	5.33333	2.66667	8
0.507796	bcd	1.2	0	5.33333	2.66667	8
0.505243	cd	0.5	0	5.33333	2.66667	8
0.500581	de	0.4	0	5.33333	2.66667	8
0.499912	de	1.3	0	5.33333	2.66667	8
0.494395	ef	0.3	0	5.33333	2.66667	8
0.489333	fg	0.2	0	5.33333	2.66667	8
0.488744	fg	1.4	0	5.33333	2.66667	8
0.48483	g	0.1	0	5.33333	2.66667	8
0.475422	h	1.5	0	5.33333	2.66667	8
0.459721	i	1.6	0	5.33333	2.66667	8
0.443249	j	1.7	0	5.33333	2.66667	8
0.424671	k	1.8	0	5.33333	2.66667	8
0.409562	l	1.9	0	5.33333	2.66667	8

## Sheet: TH_YXY_ComparingEqualWTexperime
mean	group Duncan test	MeanA	Var1	Var2	VarA	SumVar
0.634145	a	0.1	0	0.5	0.5	1
0.627413	b	0.1	0.166667	0.416667	0.416667	1
0.623489	c	0.1	0	0.666667	0.333333	1
0.621839	c	0.1	0.333333	0.333333	0.333333	1
0.612146	d	0.1	0.416667	0.416667	0.166667	1
0.604407	e	0.1	0.5	0.5	0	1
0.575903	a	0.1	0	1.5	1.5	3
0.559762	b	0.1	0.5	1.25	1.25	3
0.558499	b	0.1	0	2	1	3
0.54856	c	0.1	1	1	1	3
0.531848	d	0.1	1.25	1.25	0.5	3
0.52045	e	0.1	1.5	1.5	0	3
0.505356	a	0.1	0	4	4	8
0.48483	b	0.1	0	5.33333	2.66667	8
0.474726	c	0.1	1.33333	3.33333	3.33333	8
0.459102	d	0.1	2.66667	2.66667	2.66667	8
0.438765	e	0.1	3.33333	3.33333	1.33333	8
0.425257	f	0.1	4	4	0	8
0.649667	a	0.2	0	0.5	0.5	1
0.643202	b	0.2	0.166667	0.416667	0.416667	1
0.63953	c	0.2	0	0.666667	0.333333	1
0.637707	c	0.2	0.333333	0.333333	0.333333	1
0.629067	d	0.2	0.416667	0.416667	0.166667	1
0.621678	e	0.2	0.5	0.5	0	1
0.583959	a	0.2	0	1.5	1.5	3
0.567921	b	0.2	0	2	1	3
0.567444	b	0.2	0.5	1.25	1.25	3
0.556516	c	0.2	1	1	1	3
0.541246	d	0.2	1.25	1.25	0.5	3
0.533011	e	0.2	1.5	1.5	0	3
0.509328	a	0.2	0	4	4	8
0.489333	b	0.2	0	5.33333	2.66667	8
0.477827	c	0.2	1.33333	3.33333	3.33333	8
0.461026	d	0.2	2.66667	2.66667	2.66667	8
0.441438	e	0.2	3.33333	3.33333	1.33333	8
0.432999	f	0.2	4	4	0	8
0.667001	a	0.3	0	0.5	0.5	1
0.660478	b	0.3	0.166667	0.416667	0.416667	1
0.658356	b	0.3	0	0.666667	0.333333	1
0.655403	c	0.3	0.333333	0.333333	0.333333	1
0.647462	d	0.3	0.416667	0.416667	0.166667	1
0.639655	e	0.3	0.5	0.5	0	1
0.594195	a	0.3	0	1.5	1.5	3
0.578223	b	0.3	0	2	1	3
0.576354	b	0.3	0.5	1.25	1.25	3
0.565312	c	0.3	1	1	1	3
0.551656	d	0.3	1.25	1.25	0.5	3
0.545661	e	0.3	1.5	1.5	0	3
0.514177	a	0.3	0	4	4	8
0.494395	b	0.3	0	5.33333	2.66667	8
0.479802	c	0.3	1.33333	3.33333	3.33333	8
0.463408	d	0.3	2.66667	2.66667	2.66667	8
0.444457	e	0.3	3.33333	3.33333	1.33333	8
0.44064	e	0.3	4	4	0	8
0.685601	a	0.4	0	0.5	0.5	1
0.679019	b	0.4	0.166667	0.416667	0.416667	1
0.677829	b	0.4	0	0.666667	0.333333	1
0.673952	c	0.4	0.333333	0.333333	0.333333	1
0.667027	d	0.4	0.416667	0.416667	0.166667	1
0.659032	e	0.4	0.5	0.5	0	1
0.603692	a	0.4	0	1.5	1.5	3
0.589105	b	0.4	0	2	1	3
0.585187	b	0.4	0.5	1.25	1.25	3
0.574408	c	0.4	1	1	1	3
0.56159	d	0.4	1.25	1.25	0.5	3
0.558716	d	0.4	1.5	1.5	0	3
0.518122	a	0.4	0	4	4	8
0.500581	b	0.4	0	5.33333	2.66667	8
0.481866	c	0.4	1.33333	3.33333	3.33333	8
0.465774	d	0.4	2.66667	2.66667	2.66667	8
0.448263	e	0.4	4	4	0	8
0.447441	e	0.4	3.33333	3.33333	1.33333	8
0.705079	a	0.5	0	0.5	0.5	1
0.698228	b	0.5	0.166667	0.416667	0.416667	1
0.698221	b	0.5	0	0.666667	0.333333	1
0.692778	c	0.5	0.333333	0.333333	0.333333	1
0.686885	d	0.5	0.416667	0.416667	0.166667	1
0.678548	e	0.5	0.5	0.5	0	1
0.613073	a	0.5	0	1.5	1.5	3
0.59966	b	0.5	0	2	1	3
0.593609	c	0.5	0.5	1.25	1.25	3
0.582465	d	0.5	1	1	1	3
0.57089	e	0.5	1.25	1.25	0.5	3
0.570649	e	0.5	1.5	1.5	0	3
0.52176	a	0.5	0	4	4	8
0.505243	b	0.5	0	5.33333	2.66667	8
0.483694	c	0.5	1.33333	3.33333	3.33333	8
0.466806	d	0.5	2.66667	2.66667	2.66667	8
0.454147	e	0.5	4	4	0	8
0.4499	e	0.5	3.33333	3.33333	1.33333	8
0.725235	a	0.6	0	0.5	0.5	1
0.71891	b	0.6	0	0.666667	0.333333	1
0.717048	b	0.6	0.166667	0.416667	0.416667	1
0.711914	c	0.6	0.333333	0.333333	0.333333	1
0.706904	d	0.6	0.416667	0.416667	0.166667	1
0.699913	e	0.6	0.5	0.5	0	1
0.622334	a	0.6	0	1.5	1.5	3
0.610623	b	0.6	0	2	1	3
0.601053	c	0.6	0.5	1.25	1.25	3
0.589236	d	0.6	1	1	1	3
0.582648	e	0.6	1.5	1.5	0	3
0.579436	e	0.6	1.25	1.25	0.5	3
0.525077	a	0.6	0	4	4	8
0.51021	b	0.6	0	5.33333	2.66667	8
0.484166	c	0.6	1.33333	3.33333	3.33333	8
0.466379	d	0.6	2.66667	2.66667	2.66667	8
0.457565	e	0.6	4	4	0	8
0.450659	e	0.6	3.33333	3.33333	1.33333	8
0.743863	a	0.7	0	0.5	0.5	1
0.739355	b	0.7	0	0.666667	0.333333	1
0.734918	c	0.7	0.166667	0.416667	0.416667	1
0.729665	d	0.7	0.333333	0.333333	0.333333	1
0.725595	e	0.7	0.416667	0.416667	0.166667	1
0.721088	f	0.7	0.5	0.5	0	1
0.630036	a	0.7	0	1.5	1.5	3
0.620221	b	0.7	0	2	1	3
0.607259	c	0.7	0.5	1.25	1.25	3
0.595067	d	0.7	1	1	1	3
0.590857	d	0.7	1.5	1.5	0	3
0.585416	e	0.7	1.25	1.25	0.5	3
0.527756	a	0.7	0	4	4	8
0.514036	b	0.7	0	5.33333	2.66667	8
0.483184	c	0.7	1.33333	3.33333	3.33333	8
0.465532	d	0.7	2.66667	2.66667	2.66667	8
0.457593	e	0.7	4	4	0	8
0.449796	f	0.7	3.33333	3.33333	1.33333	8
0.759854	a	0.8	0	0.5	0.5	1
0.75685	b	0.8	0	0.666667	0.333333	1
0.749757	c	0.8	0.166667	0.416667	0.416667	1
0.743747	d	0.8	0.333333	0.333333	0.333333	1
0.740727	e	0.8	0.416667	0.416667	0.166667	1
0.740606	e	0.8	0.5	0.5	0	1
0.637232	a	0.8	0	1.5	1.5	3
0.628646	b	0.8	0	2	1	3
0.611252	c	0.8	0.5	1.25	1.25	3
0.598026	d	0.8	1	1	1	3
0.594559	d	0.8	1.5	1.5	0	3
0.5889	e	0.8	1.25	1.25	0.5	3
0.528755	a	0.8	0	4	4	8
0.516035	b	0.8	0	5.33333	2.66667	8
0.48165	c	0.8	1.33333	3.33333	3.33333	8
0.462725	d	0.8	2.66667	2.66667	2.66667	8
0.455114	de	0.8	4	4	0	8
0.448001	e	0.8	3.33333	3.33333	1.33333	8
0.771191	a	0.9	0	0.5	0.5	1
0.769565	a	0.9	0	0.666667	0.333333	1
0.759138	b	0.9	0.166667	0.416667	0.416667	1
0.752008	c	0.9	0.333333	0.333333	0.333333	1
0.751249	cd	0.9	0.5	0.5	0	1
0.749287	d	0.9	0.416667	0.416667	0.166667	1
0.640399	a	0.9	0	1.5	1.5	3
0.633982	b	0.9	0	2	1	3
0.612303	c	0.9	0.5	1.25	1.25	3
0.597547	d	0.9	1	1	1	3
0.593174	de	0.9	1.5	1.5	0	3
0.588238	e	0.9	1.25	1.25	0.5	3
0.529307	a	0.9	0	4	4	8
0.517508	b	0.9	0	5.33333	2.66667	8
0.477393	c	0.9	1.33333	3.33333	3.33333	8
0.458649	d	0.9	2.66667	2.66667	2.66667	8
0.44874	e	0.9	4	4	0	8
0.444003	e	0.9	3.33333	3.33333	1.33333	8
0.774281	a	1	0	0.5	0.5	1
0.773852	a	1	0	0.666667	0.333333	1
0.760485	b	1	0.166667	0.416667	0.416667	1
0.75159	c	1	0.333333	0.333333	0.333333	1
0.749484	cd	1	0.5	0.5	0	1
0.747937	d	1	0.416667	0.416667	0.166667	1
0.641293	a	1	0	1.5	1.5	3
0.635702	a	1	0	2	1	3
0.609459	b	1	0.5	1.25	1.25	3
0.593407	c	1	1	1	1	3
0.585336	d	1	1.5	1.5	0	3
0.582697	d	1	1.25	1.25	0.5	3
0.527927	a	1	0	4	4	8
0.517212	b	1	0	5.33333	2.66667	8
0.472787	c	1	1.33333	3.33333	3.33333	8
0.453052	d	1	2.66667	2.66667	2.66667	8
0.440685	e	1	4	4	0	8
0.438501	e	1	3.33333	3.33333	1.33333	8
0.766788	a	1.1	0	0.5	0.5	1
0.763986	a	1.1	0	0.666667	0.333333	1
0.751202	b	1.1	0.166667	0.416667	0.416667	1
0.740686	c	1.1	0.333333	0.333333	0.333333	1
0.735017	d	1.1	0.416667	0.416667	0.166667	1
0.733847	d	1.1	0.5	0.5	0	1
0.637859	a	1.1	0	1.5	1.5	3
0.631142	b	1.1	0	2	1	3
0.602241	c	1.1	0.5	1.25	1.25	3
0.585132	d	1.1	1	1	1	3
0.573566	e	1.1	1.25	1.25	0.5	3
0.572005	e	1.1	1.5	1.5	0	3
0.52431	a	1.1	0	4	4	8
0.513427	b	1.1	0	5.33333	2.66667	8
0.465936	c	1.1	1.33333	3.33333	3.33333	8
0.445579	d	1.1	2.66667	2.66667	2.66667	8
0.43081	e	1.1	3.33333	3.33333	1.33333	8
0.430413	e	1.1	4	4	0	8
0.746725	a	1.2	0	0.5	0.5	1
0.741653	b	1.2	0	0.666667	0.333333	1
0.732345	c	1.2	0.166667	0.416667	0.416667	1
0.720282	d	1.2	0.333333	0.333333	0.333333	1
0.712457	e	1.2	0.416667	0.416667	0.166667	1
0.707648	f	1.2	0.5	0.5	0	1
0.627797	a	1.2	0	1.5	1.5	3
0.621112	a	1.2	0	2	1	3
0.591422	b	1.2	0.5	1.25	1.25	3
0.573112	c	1.2	1	1	1	3
0.559819	d	1.2	1.25	1.25	0.5	3
0.55473	d	1.2	1.5	1.5	0	3
0.517391	a	1.2	0	4	4	8
0.507796	a	1.2	0	5.33333	2.66667	8
0.457165	b	1.2	1.33333	3.33333	3.33333	8
0.43675	c	1.2	2.66667	2.66667	2.66667	8
0.420807	d	1.2	3.33333	3.33333	1.33333	8
0.418557	d	1.2	4	4	0	8
0.716299	a	1.3	0	0.5	0.5	1
0.70835	b	1.3	0	0.666667	0.333333	1
0.704081	c	1.3	0.166667	0.416667	0.416667	1
0.691515	d	1.3	0.333333	0.333333	0.333333	1
0.683224	e	1.3	0.416667	0.416667	0.166667	1
0.676405	f	1.3	0.5	0.5	0	1
0.614225	a	1.3	0	1.5	1.5	3
0.603871	b	1.3	0	2	1	3
0.577218	c	1.3	0.5	1.25	1.25	3
0.557202	d	1.3	1	1	1	3
0.5432	e	1.3	1.25	1.25	0.5	3
0.535227	f	1.3	1.5	1.5	0	3
0.508626	a	1.3	0	4	4	8
0.499912	a	1.3	0	5.33333	2.66667	8
0.447537	b	1.3	1.33333	3.33333	3.33333	8
0.426187	c	1.3	2.66667	2.66667	2.66667	8
0.409986	d	1.3	3.33333	3.33333	1.33333	8
0.40545	d	1.3	4	4	0	8
0.680021	a	1.4	0	0.5	0.5	1
0.672159	b	1.4	0	0.666667	0.333333	1
0.671626	b	1.4	0.166667	0.416667	0.416667	1
0.660201	c	1.4	0.333333	0.333333	0.333333	1
0.650419	d	1.4	0.416667	0.416667	0.166667	1
0.643035	e	1.4	0.5	0.5	0	1
0.594087	a	1.4	0	1.5	1.5	3
0.583724	b	1.4	0	2	1	3
0.559294	c	1.4	0.5	1.25	1.25	3
0.540079	d	1.4	1	1	1	3
0.524498	e	1.4	1.25	1.25	0.5	3
0.51516	f	1.4	1.5	1.5	0	3
0.498468	a	1.4	0	4	4	8
0.488744	a	1.4	0	5.33333	2.66667	8
0.435844	b	1.4	1.33333	3.33333	3.33333	8
0.414333	c	1.4	2.66667	2.66667	2.66667	8
0.398909	d	1.4	3.33333	3.33333	1.33333	8
0.391828	d	1.4	4	4	0	8
0.643498	a	1.5	0	0.5	0.5	1
0.637765	b	1.5	0.166667	0.416667	0.416667	1
0.635469	b	1.5	0	0.666667	0.333333	1
0.626909	c	1.5	0.333333	0.333333	0.333333	1
0.618036	d	1.5	0.416667	0.416667	0.166667	1
0.609674	e	1.5	0.5	0.5	0	1
0.571126	a	1.5	0	1.5	1.5	3
0.560349	b	1.5	0	2	1	3
0.539135	c	1.5	0.5	1.25	1.25	3
0.519563	d	1.5	1	1	1	3
0.504087	e	1.5	1.25	1.25	0.5	3
0.493675	f	1.5	1.5	1.5	0	3
0.485367	a	1.5	0	4	4	8
0.475422	a	1.5	0	5.33333	2.66667	8
0.422754	b	1.5	1.33333	3.33333	3.33333	8
0.402428	c	1.5	2.66667	2.66667	2.66667	8
0.386619	d	1.5	3.33333	3.33333	1.33333	8
0.378724	d	1.5	4	4	0	8
0.607719	a	1.6	0	0.5	0.5	1
0.60374	b	1.6	0.166667	0.416667	0.416667	1
0.600192	c	1.6	0	0.666667	0.333333	1
0.594477	d	1.6	0.333333	0.333333	0.333333	1
0.585654	e	1.6	0.416667	0.416667	0.166667	1
0.577387	f	1.6	0.5	0.5	0	1
0.54776	a	1.6	0	1.5	1.5	3
0.535757	b	1.6	0	2	1	3
0.518637	c	1.6	0.5	1.25	1.25	3
0.49997	d	1.6	1	1	1	3
0.483806	e	1.6	1.25	1.25	0.5	3
0.471865	f	1.6	1.5	1.5	0	3
0.471154	a	1.6	0	4	4	8
0.459721	b	1.6	0	5.33333	2.66667	8
0.410529	c	1.6	1.33333	3.33333	3.33333	8
0.389332	d	1.6	2.66667	2.66667	2.66667	8
0.373485	e	1.6	3.33333	3.33333	1.33333	8
0.364913	e	1.6	4	4	0	8
0.574644	a	1.7	0	0.5	0.5	1
0.5722	a	1.7	0.166667	0.416667	0.416667	1
0.567391	b	1.7	0	0.666667	0.333333	1
0.563407	c	1.7	0.333333	0.333333	0.333333	1
0.555506	d	1.7	0.416667	0.416667	0.166667	1
0.547424	e	1.7	0.5	0.5	0	1
0.523424	a	1.7	0	1.5	1.5	3
0.511011	b	1.7	0	2	1	3
0.497619	c	1.7	0.5	1.25	1.25	3
0.478776	d	1.7	1	1	1	3
0.462706	e	1.7	1.25	1.25	0.5	3
0.450954	f	1.7	1.5	1.5	0	3
0.454768	a	1.7	0	4	4	8
0.443249	b	1.7	0	5.33333	2.66667	8
0.39644	c	1.7	1.33333	3.33333	3.33333	8
0.376011	d	1.7	2.66667	2.66667	2.66667	8
0.360448	e	1.7	3.33333	3.33333	1.33333	8
0.351734	e	1.7	4	4	0	8
0.543841	a	1.8	0	0.5	0.5	1
0.542142	a	1.8	0.166667	0.416667	0.416667	1
0.537394	b	1.8	0	0.666667	0.333333	1
0.534605	c	1.8	0.333333	0.333333	0.333333	1
0.5264	d	1.8	0.416667	0.416667	0.166667	1
0.518732	e	1.8	0.5	0.5	0	1
0.499294	a	1.8	0	1.5	1.5	3
0.487576	b	1.8	0	2	1	3
0.475505	c	1.8	0.5	1.25	1.25	3
0.457902	d	1.8	1	1	1	3
0.442139	e	1.8	1.25	1.25	0.5	3
0.430294	f	1.8	1.5	1.5	0	3
0.437823	a	1.8	0	4	4	8
0.424671	b	1.8	0	5.33333	2.66667	8
0.382217	c	1.8	1.33333	3.33333	3.33333	8
0.362087	d	1.8	2.66667	2.66667	2.66667	8
0.34805	e	1.8	3.33333	3.33333	1.33333	8
0.337459	f	1.8	4	4	0	8
0.515854	a	1.9	0	0.5	0.5	1
0.514973	a	1.9	0.166667	0.416667	0.416667	1
0.509442	b	1.9	0	0.666667	0.333333	1
0.507304	b	1.9	0.333333	0.333333	0.333333	1
0.499591	c	1.9	0.416667	0.416667	0.166667	1
0.492369	d	1.9	0.5	0.5	0	1
0.475476	a	1.9	0	1.5	1.5	3
0.463852	b	1.9	0	2	1	3
0.453875	c	1.9	0.5	1.25	1.25	3
0.43686	d	1.9	1	1	1	3
0.421843	e	1.9	1.25	1.25	0.5	3
0.410527	f	1.9	1.5	1.5	0	3
0.421279	a	1.9	0	4	4	8
0.409562	b	1.9	0	5.33333	2.66667	8
0.36745	c	1.9	1.33333	3.33333	3.33333	8
0.348147	d	1.9	2.66667	2.66667	2.66667	8
0.334382	e	1.9	3.33333	3.33333	1.33333	8
0.323746	f	1.9	4	4	0	8

## Sheet: IDSCV_YXY_ComparingEqualVTexper
mean	group	MeanA	SCV1	SCV2	SCVA	SumSCV
0.933449	a	1.9	1	1	1	3
0.918177	b	1.8	1	1	1	3
0.902281	c	1.7	1	1	1	3
0.887235	d	1.6	1	1	1	3
0.868228	e	1.5	1	1	1	3
0.861326	e	1.4	1	1	1	3
0.848955	f	1.3	1	1	1	3
0.842705	fg	1.1	1	1	1	3
0.842556	fg	1.2	1	1	1	3
0.838613	fg	1	1	1	1	3
0.835976	g	0.9	1	1	1	3
0.834123	gh	0.8	1	1	1	3
0.829615	gh	0.6	1	1	1	3
0.829614	gh	0.7	1	1	1	3
0.821626	h	0.5	1	1	1	3
0.809806	i	0.4	1	1	1	3
0.797275	j	0.3	1	1	1	3
0.785245	k	0.2	1	1	1	3
0.774793	k	0.1	1	1	1	3
1.17158	a	1.9	0.5	1.25	1.25	3
1.14479	b	1.8	0.5	1.25	1.25	3
1.11745	c	1.7	0.5	1.25	1.25	3
1.08987	d	1.6	0.5	1.25	1.25	3
1.05279	e	1.5	0.5	1.25	1.25	3
1.03111	f	1.4	0.5	1.25	1.25	3
0.99516	g	1.3	0.5	1.25	1.25	3
0.964367	h	1.2	0.5	1.25	1.25	3
0.940884	i	1.1	0.5	1.25	1.25	3
0.904327	j	1	0.5	1.25	1.25	3
0.890998	j	0.9	0.5	1.25	1.25	3
0.859838	k	0.8	0.5	1.25	1.25	3
0.8405	l	0.7	0.5	1.25	1.25	3
0.828477	l	0.6	0.5	1.25	1.25	3
0.802242	m	0.5	0.5	1.25	1.25	3
0.772762	n	0.4	0.5	1.25	1.25	3
0.755769	no	0.3	0.5	1.25	1.25	3
0.737355	op	0.2	0.5	1.25	1.25	3
0.727633	p	0.1	0.5	1.25	1.25	3
0.960517	a	0.3	1.25	1.25	0.5	3
0.960146	a	0.4	1.25	1.25	0.5	3
0.956132	ab	0.5	1.25	1.25	0.5	3
0.950762	ab	0.2	1.25	1.25	0.5	3
0.944123	ab	0.6	1.25	1.25	0.5	3
0.940529	b	0.1	1.25	1.25	0.5	3
0.919988	c	0.7	1.25	1.25	0.5	3
0.88822	d	0.8	1.25	1.25	0.5	3
0.846197	e	0.9	1.25	1.25	0.5	3
0.803646	f	1	1.25	1.25	0.5	3
0.755245	g	1.1	1.25	1.25	0.5	3
0.706629	h	1.2	1.25	1.25	0.5	3
0.661374	i	1.3	1.25	1.25	0.5	3
0.622875	j	1.4	1.25	1.25	0.5	3
0.588865	k	1.5	1.25	1.25	0.5	3
0.561654	l	1.6	1.25	1.25	0.5	3
0.541715	m	1.7	1.25	1.25	0.5	3
0.52805	mn	1.8	1.25	1.25	0.5	3
0.518135	n	1.9	1.25	1.25	0.5	3
1.41918	a	1.9	0	1.5	1.5	3
1.40452	a	1.8	0	1.5	1.5	3
1.3966	ab	1.7	0	1.5	1.5	3
1.37474	b	1.6	0	1.5	1.5	3
1.33978	c	1.5	0	1.5	1.5	3
1.30438	d	1.4	0	1.5	1.5	3
1.26144	e	1.3	0	1.5	1.5	3
1.21866	f	1.2	0	1.5	1.5	3
1.18604	g	1.1	0	1.5	1.5	3
1.13738	h	1	0	1.5	1.5	3
1.09514	i	0.9	0	1.5	1.5	3
1.03997	j	0.8	0	1.5	1.5	3
1.00339	k	0.7	0	1.5	1.5	3
0.974215	l	0.6	0	1.5	1.5	3
0.922611	m	0.5	0	1.5	1.5	3
0.889428	n	0.4	0	1.5	1.5	3
0.854433	o	0.3	0	1.5	1.5	3
0.827665	p	0.2	0	1.5	1.5	3
0.808063	p	0.1	0	1.5	1.5	3
1.10361	a	0.2	1.5	1.5	0	3
1.10296	a	0.3	1.5	1.5	0	3
1.09981	a	0.1	1.5	1.5	0	3
1.09348	a	0.4	1.5	1.5	0	3
1.09151	a	0.5	1.5	1.5	0	3
1.07176	a	0.6	1.5	1.5	0	3
1.02961	b	0.7	1.5	1.5	0	3
0.969555	c	0.8	1.5	1.5	0	3
0.892412	d	0.9	1.5	1.5	0	3
0.799811	e	1	1.5	1.5	0	3
0.701755	f	1.1	1.5	1.5	0	3
0.60202	g	1.2	1.5	1.5	0	3
0.501451	h	1.3	1.5	1.5	0	3
0.403808	i	1.4	1.5	1.5	0	3
0.321614	j	1.5	1.5	1.5	0	3
0.252135	k	1.6	1.5	1.5	0	3
0.188137	l	1.7	1.5	1.5	0	3
0.138683	m	1.8	1.5	1.5	0	3
0.10032	n	1.9	1.5	1.5	0	3
0.360221	a	0.8	0.333333	0.333333	0.333333	1
0.358428	ab	0.9	0.333333	0.333333	0.333333	1
0.356257	ab	0.7	0.333333	0.333333	0.333333	1
0.353034	b	1	0.333333	0.333333	0.333333	1
0.345015	c	0.6	0.333333	0.333333	0.333333	1
0.34434	c	1.1	0.333333	0.333333	0.333333	1
0.337023	d	1.2	0.333333	0.333333	0.333333	1
0.334113	de	1.9	0.333333	0.333333	0.333333	1
0.332215	de	1.3	0.333333	0.333333	0.333333	1
0.330155	e	0.5	0.333333	0.333333	0.333333	1
0.330026	e	1.8	0.333333	0.333333	0.333333	1
0.329554	e	1.7	0.333333	0.333333	0.333333	1
0.329511	e	1.6	0.333333	0.333333	0.333333	1
0.328771	e	1.4	0.333333	0.333333	0.333333	1
0.328001	e	1.5	0.333333	0.333333	0.333333	1
0.313502	f	0.4	0.333333	0.333333	0.333333	1
0.297462	g	0.3	0.333333	0.333333	0.333333	1
0.285432	h	0.2	0.333333	0.333333	0.333333	1
0.278334	i	0.1	0.333333	0.333333	0.333333	1
0.415622	a	1.9	0.166667	0.416667	0.416667	1
0.41261	ab	1.7	0.166667	0.416667	0.416667	1
0.411143	ab	1.8	0.166667	0.416667	0.416667	1
0.408786	abc	1.6	0.166667	0.416667	0.416667	1
0.406142	bc	1.5	0.166667	0.416667	0.416667	1
0.402292	cd	1.4	0.166667	0.416667	0.416667	1
0.398059	de	1.3	0.166667	0.416667	0.416667	1
0.395705	de	1.2	0.166667	0.416667	0.416667	1
0.394321	e	1.1	0.166667	0.416667	0.416667	1
0.391895	ef	1	0.166667	0.416667	0.416667	1
0.386991	f	0.9	0.166667	0.416667	0.416667	1
0.379225	g	0.8	0.166667	0.416667	0.416667	1
0.365697	h	0.7	0.166667	0.416667	0.416667	1
0.346141	i	0.6	0.166667	0.416667	0.416667	1
0.323263	j	0.5	0.166667	0.416667	0.416667	1
0.300421	k	0.4	0.166667	0.416667	0.416667	1
0.279651	l	0.3	0.166667	0.416667	0.416667	1
0.263466	m	0.2	0.166667	0.416667	0.416667	1
0.254945	n	0.1	0.166667	0.416667	0.416667	1
0.368087	a	0.6	0.416667	0.416667	0.166667	1
0.365305	ab	0.5	0.416667	0.416667	0.166667	1
0.363985	ab	0.7	0.416667	0.416667	0.166667	1
0.357879	bc	0.4	0.416667	0.416667	0.166667	1
0.350637	cd	0.3	0.416667	0.416667	0.166667	1
0.349431	cd	0.8	0.416667	0.416667	0.166667	1
0.344864	d	0.2	0.416667	0.416667	0.166667	1
0.341689	d	0.1	0.416667	0.416667	0.166667	1
0.325943	e	0.9	0.416667	0.416667	0.166667	1
0.293905	f	1	0.416667	0.416667	0.166667	1
0.260033	g	1.1	0.416667	0.416667	0.166667	1
0.229935	h	1.2	0.416667	0.416667	0.166667	1
0.207585	i	1.3	0.416667	0.416667	0.166667	1
0.190446	j	1.4	0.416667	0.416667	0.166667	1
0.180143	k	1.5	0.416667	0.416667	0.166667	1
0.17437	kl	1.6	0.416667	0.416667	0.166667	1
0.170526	l	1.7	0.416667	0.416667	0.166667	1
0.168088	l	1.8	0.416667	0.416667	0.166667	1
0.167454	l	1.9	0.416667	0.416667	0.166667	1
0.496532	a	1.8	0	0.5	0.5	1
0.495196	a	1.9	0	0.5	0.5	1
0.494459	a	1.7	0	0.5	0.5	1
0.492269	ab	1.6	0	0.5	0.5	1
0.491049	ab	1.5	0	0.5	0.5	1
0.487369	ab	1.4	0	0.5	0.5	1
0.48182	bc	1.3	0	0.5	0.5	1
0.476839	c	1.2	0	0.5	0.5	1
0.471778	cd	1.1	0	0.5	0.5	1
0.463419	d	1	0	0.5	0.5	1
0.452876	e	0.9	0	0.5	0.5	1
0.433105	f	0.8	0	0.5	0.5	1
0.40638	g	0.7	0	0.5	0.5	1
0.375081	h	0.6	0	0.5	0.5	1
0.342919	i	0.5	0	0.5	0.5	1
0.312803	j	0.4	0	0.5	0.5	1
0.285566	k	0.3	0	0.5	0.5	1
0.264799	l	0.2	0	0.5	0.5	1
0.253322	m	0.1	0	0.5	0.5	1
0.404212	a	0.1	0.5	0.5	0	1
0.404146	a	0.4	0.5	0.5	0	1
0.404119	a	0.2	0.5	0.5	0	1
0.403765	a	0.3	0.5	0.5	0	1
0.401362	a	0.5	0.5	0.5	0	1
0.391991	a	0.6	0.5	0.5	0	1
0.375545	b	0.7	0.5	0.5	0	1
0.34506	c	0.8	0.5	0.5	0	1
0.299122	d	0.9	0.5	0.5	0	1
0.240514	e	1	0.5	0.5	0	1
0.177331	f	1.1	0.5	0.5	0	1
0.123689	g	1.2	0.5	0.5	0	1
0.0795872	h	1.3	0.5	0.5	0	1
0.0492277	i	1.4	0.5	0.5	0	1
0.0294373	j	1.5	0.5	0.5	0	1
0.0168031	jk	1.6	0.5	0.5	0	1
0.00923389	kl	1.7	0.5	0.5	0	1
0.00498655	kl	1.8	0.5	0.5	0	1
0.00260964	l	1.9	0.5	0.5	0	1
2.13208	a	1.9	2.66667	2.66667	2.66667	8
2.02693	b	1.8	2.66667	2.66667	2.66667	8
1.98401	bc	1.7	2.66667	2.66667	2.66667	8
1.93402	cd	1.6	2.66667	2.66667	2.66667	8
1.89337	de	1.5	2.66667	2.66667	2.66667	8
1.8467	ef	1.4	2.66667	2.66667	2.66667	8
1.83312	ef	0.6	2.66667	2.66667	2.66667	8
1.82371	ef	1.3	2.66667	2.66667	2.66667	8
1.81576	ef	0.3	2.66667	2.66667	2.66667	8
1.80704	ef	0.7	2.66667	2.66667	2.66667	8
1.80634	ef	0.4	2.66667	2.66667	2.66667	8
1.80618	ef	0.5	2.66667	2.66667	2.66667	8
1.80438	ef	0.2	2.66667	2.66667	2.66667	8
1.7981	f	0.8	2.66667	2.66667	2.66667	8
1.79787	f	1.2	2.66667	2.66667	2.66667	8
1.79549	f	0.1	2.66667	2.66667	2.66667	8
1.78643	f	0.9	2.66667	2.66667	2.66667	8
1.77884	f	1	2.66667	2.66667	2.66667	8
1.77836	f	1.1	2.66667	2.66667	2.66667	8
2.64191	a	1.9	1.33333	3.33333	3.33333	8
2.47775	b	1.8	1.33333	3.33333	3.33333	8
2.41114	b	1.7	1.33333	3.33333	3.33333	8
2.37074	b	1.6	1.33333	3.33333	3.33333	8
2.24874	c	1.5	1.33333	3.33333	3.33333	8
2.14014	cd	1.4	1.33333	3.33333	3.33333	8
2.08116	d	1.3	1.33333	3.33333	3.33333	8
2.02532	de	1.2	1.33333	3.33333	3.33333	8
1.93539	ef	1.1	1.33333	3.33333	3.33333	8
1.89056	fg	1	1.33333	3.33333	3.33333	8
1.86579	fgh	0.9	1.33333	3.33333	3.33333	8
1.83435	fghi	0.8	1.33333	3.33333	3.33333	8
1.80865	fghi	0.6	1.33333	3.33333	3.33333	8
1.80677	fghi	0.7	1.33333	3.33333	3.33333	8
1.79576	ghi	0.5	1.33333	3.33333	3.33333	8
1.75271	hi	0.4	1.33333	3.33333	3.33333	8
1.73264	hi	0.3	1.33333	3.33333	3.33333	8
1.72221	i	0.2	1.33333	3.33333	3.33333	8
1.71135	i	0.1	1.33333	3.33333	3.33333	8
2.17751	a	0.1	3.33333	3.33333	1.33333	8
2.16353	ab	0.2	3.33333	3.33333	1.33333	8
2.16091	ab	0.3	3.33333	3.33333	1.33333	8
2.14651	ab	0.4	3.33333	3.33333	1.33333	8
2.13242	ab	0.5	3.33333	3.33333	1.33333	8
2.09646	ab	0.6	3.33333	3.33333	1.33333	8
2.08114	b	0.7	3.33333	3.33333	1.33333	8
1.98179	c	0.8	3.33333	3.33333	1.33333	8
1.91098	c	0.9	3.33333	3.33333	1.33333	8
1.82684	d	1	3.33333	3.33333	1.33333	8
1.73561	e	1.1	3.33333	3.33333	1.33333	8
1.67628	ef	1.2	3.33333	3.33333	1.33333	8
1.62371	f	1.3	3.33333	3.33333	1.33333	8
1.54671	g	1.4	3.33333	3.33333	1.33333	8
1.48892	gh	1.5	3.33333	3.33333	1.33333	8
1.44167	hi	1.6	3.33333	3.33333	1.33333	8
1.39857	ij	1.7	3.33333	3.33333	1.33333	8
1.36227	ij	1.8	3.33333	3.33333	1.33333	8
1.32394	j	1.9	3.33333	3.33333	1.33333	8
3.46337	a	1.9	0	4	4	8
3.19026	b	1.8	0	4	4	8
3.17625	b	1.7	0	4	4	8
3.10617	b	1.6	0	4	4	8
3.04255	b	1.4	0	4	4	8
3.02016	b	1.5	0	4	4	8
2.70034	c	1.2	0	4	4	8
2.6891	c	1.3	0	4	4	8
2.50317	cd	1.1	0	4	4	8
2.45218	d	0.9	0	4	4	8
2.44288	de	1	0	4	4	8
2.32233	def	0.8	0	4	4	8
2.32202	def	0.7	0	4	4	8
2.23656	efg	0.6	0	4	4	8
2.22348	fg	0.4	0	4	4	8
2.204	fg	0.5	0	4	4	8
2.11831	fg	0.3	0	4	4	8
2.03686	g	0.1	0	4	4	8
2.03294	g	0.2	0	4	4	8
2.55303	a	0.3	4	4	0	8
2.54836	a	0.1	4	4	0	8
2.54138	a	0.2	4	4	0	8
2.52897	a	0.4	4	4	0	8
2.46498	a	0.5	4	4	0	8
2.45844	a	0.6	4	4	0	8
2.43355	ab	0.7	4	4	0	8
2.32357	b	0.8	4	4	0	8
2.16433	c	0.9	4	4	0	8
2.02727	d	1	4	4	0	8
1.88624	e	1.1	4	4	0	8
1.75472	f	1.2	4	4	0	8
1.55467	g	1.3	4	4	0	8
1.4242	h	1.4	4	4	0	8
1.26127	i	1.5	4	4	0	8
1.10111	j	1.6	4	4	0	8
0.944973	k	1.7	4	4	0	8
0.804639	l	1.8	4	4	0	8
0.651119	m	1.9	4	4	0	8
1.18859	a	0.6	0	2	1	3
1.17116	ab	0.5	0	2	1	3
1.16858	ab	0.8	0	2	1	3
1.1646	abc	0.9	0	2	1	3
1.16274	abc	0.7	0	2	1	3
1.13711	bcd	0.4	0	2	1	3
1.13455	bcd	1	0	2	1	3
1.12503	cd	1.1	0	2	1	3
1.1152	de	0.3	0	2	1	3
1.0972	def	1.2	0	2	1	3
1.08342	efg	1.3	0	2	1	3
1.08109	efgh	0.2	0	2	1	3
1.06222	fghi	0.1	0	2	1	3
1.05123	ghi	1.4	0	2	1	3
1.0418	hij	1.5	0	2	1	3
1.0294	ijk	1.6	0	2	1	3
1.00842	jk	1.7	0	2	1	3
1.00455	jk	1.8	0	2	1	3
0.997258	k	1.9	0	2	1	3
0.444587	a	0.8	0	0.666667	0.333333	1
0.440981	a	0.9	0	0.666667	0.333333	1
0.439298	a	0.7	0	0.666667	0.333333	1
0.426208	b	1	0	0.666667	0.333333	1
0.422167	b	0.6	0	0.666667	0.333333	1
0.402078	c	1.1	0	0.666667	0.333333	1
0.401146	c	0.5	0	0.666667	0.333333	1
0.380938	d	1.2	0	0.666667	0.333333	1
0.379533	d	0.4	0	0.666667	0.333333	1
0.363334	e	1.3	0	0.666667	0.333333	1
0.359154	e	0.3	0	0.666667	0.333333	1
0.352192	ef	1.4	0	0.666667	0.333333	1
0.346972	fg	0.2	0	0.666667	0.333333	1
0.343347	fg	1.5	0	0.666667	0.333333	1
0.340024	g	0.1	0	0.666667	0.333333	1
0.338294	g	1.6	0	0.666667	0.333333	1
0.335593	g	1.7	0	0.666667	0.333333	1
0.335553	g	1.9	0	0.666667	0.333333	1
0.334375	g	1.8	0	0.666667	0.333333	1
2.90189	a	0.3	0	5.33333	2.66667	8
2.85001	ab	0.6	0	5.33333	2.66667	8
2.84176	ab	0.4	0	5.33333	2.66667	8
2.76585	abc	0.7	0	5.33333	2.66667	8
2.7239	abc	0.9	0	5.33333	2.66667	8
2.72112	abc	0.2	0	5.33333	2.66667	8
2.70489	abc	1.1	0	5.33333	2.66667	8
2.68512	abc	0.5	0	5.33333	2.66667	8
2.6626	abc	1.2	0	5.33333	2.66667	8
2.6435	abc	1	0	5.33333	2.66667	8
2.61093	bc	0.8	0	5.33333	2.66667	8
2.60279	bc	0.1	0	5.33333	2.66667	8
2.5874	bc	1.3	0	5.33333	2.66667	8
2.57089	bc	1.4	0	5.33333	2.66667	8
2.5685	bc	1.8	0	5.33333	2.66667	8
2.54496	c	1.5	0	5.33333	2.66667	8
2.53458	c	1.6	0	5.33333	2.66667	8
2.53049	c	1.7	0	5.33333	2.66667	8
2.51591	c	1.9	0	5.33333	2.66667	8

## Sheet: IDSCV_YXY_ComparingEqualWTexper
mean	group	MeanA	SCV1	SCV2	SCVA	SumSCV
0.404212	a	0.1	0.5	0.5	0	1
0.341689	b	0.1	0.416667	0.416667	0.166667	1
0.340024	b	0.1	0	0.666667	0.333333	1
0.278334	c	0.1	0.333333	0.333333	0.333333	1
0.254945	d	0.1	0.166667	0.416667	0.416667	1
0.253322	d	0.1	0	0.5	0.5	1
1.09981	a	0.1	1.5	1.5	0	3
1.06222	a	0.1	0	2	1	3
0.940529	b	0.1	1.25	1.25	0.5	3
0.808063	c	0.1	0	1.5	1.5	3
0.774793	c	0.1	1	1	1	3
0.727633	d	0.1	0.5	1.25	1.25	3
2.60279	a	0.1	0	5.33333	2.66667	8
2.54836	a	0.1	4	4	0	8
2.17751	b	0.1	3.33333	3.33333	1.33333	8
2.03686	c	0.1	0	4	4	8
1.79549	d	0.1	2.66667	2.66667	2.66667	8
1.71135	d	0.1	1.33333	3.33333	3.33333	8
0.404119	a	0.2	0.5	0.5	0	1
0.346972	b	0.2	0	0.666667	0.333333	1
0.344864	b	0.2	0.416667	0.416667	0.166667	1
0.285432	c	0.2	0.333333	0.333333	0.333333	1
0.264799	d	0.2	0	0.5	0.5	1
0.263466	d	0.2	0.166667	0.416667	0.416667	1
1.10361	a	0.2	1.5	1.5	0	3
1.08109	a	0.2	0	2	1	3
0.950762	b	0.2	1.25	1.25	0.5	3
0.827665	c	0.2	0	1.5	1.5	3
0.785245	d	0.2	1	1	1	3
0.737355	e	0.2	0.5	1.25	1.25	3
2.72112	a	0.2	0	5.33333	2.66667	8
2.54138	b	0.2	4	4	0	8
2.16353	c	0.2	3.33333	3.33333	1.33333	8
2.03294	c	0.2	0	4	4	8
1.80438	d	0.2	2.66667	2.66667	2.66667	8
1.72221	d	0.2	1.33333	3.33333	3.33333	8
0.403765	a	0.3	0.5	0.5	0	1
0.359154	b	0.3	0	0.666667	0.333333	1
0.350637	b	0.3	0.416667	0.416667	0.166667	1
0.297462	c	0.3	0.333333	0.333333	0.333333	1
0.285566	d	0.3	0	0.5	0.5	1
0.279651	d	0.3	0.166667	0.416667	0.416667	1
1.1152	a	0.3	0	2	1	3
1.10296	a	0.3	1.5	1.5	0	3
0.960517	b	0.3	1.25	1.25	0.5	3
0.854433	c	0.3	0	1.5	1.5	3
0.797275	d	0.3	1	1	1	3
0.755769	e	0.3	0.5	1.25	1.25	3
2.90189	a	0.3	0	5.33333	2.66667	8
2.55303	b	0.3	4	4	0	8
2.16091	c	0.3	3.33333	3.33333	1.33333	8
2.11831	c	0.3	0	4	4	8
1.81576	d	0.3	2.66667	2.66667	2.66667	8
1.73264	d	0.3	1.33333	3.33333	3.33333	8
0.404146	a	0.4	0.5	0.5	0	1
0.379533	b	0.4	0	0.666667	0.333333	1
0.357879	c	0.4	0.416667	0.416667	0.166667	1
0.313502	d	0.4	0.333333	0.333333	0.333333	1
0.312803	d	0.4	0	0.5	0.5	1
0.300421	e	0.4	0.166667	0.416667	0.416667	1
1.13711	a	0.4	0	2	1	3
1.09348	b	0.4	1.5	1.5	0	3
0.960146	c	0.4	1.25	1.25	0.5	3
0.889428	d	0.4	0	1.5	1.5	3
0.809806	e	0.4	1	1	1	3
0.772762	f	0.4	0.5	1.25	1.25	3
2.84176	a	0.4	0	5.33333	2.66667	8
2.52897	b	0.4	4	4	0	8
2.22348	c	0.4	0	4	4	8
2.14651	c	0.4	3.33333	3.33333	1.33333	8
1.80634	d	0.4	2.66667	2.66667	2.66667	8
1.75271	d	0.4	1.33333	3.33333	3.33333	8
0.401362	a	0.5	0.5	0.5	0	1
0.401146	a	0.5	0	0.666667	0.333333	1
0.365305	b	0.5	0.416667	0.416667	0.166667	1
0.342919	c	0.5	0	0.5	0.5	1
0.330155	d	0.5	0.333333	0.333333	0.333333	1
0.323263	e	0.5	0.166667	0.416667	0.416667	1
1.17116	a	0.5	0	2	1	3
1.09151	b	0.5	1.5	1.5	0	3
0.956132	c	0.5	1.25	1.25	0.5	3
0.922611	c	0.5	0	1.5	1.5	3
0.821626	d	0.5	1	1	1	3
0.802242	d	0.5	0.5	1.25	1.25	3
2.68512	a	0.5	0	5.33333	2.66667	8
2.46498	b	0.5	4	4	0	8
2.204	c	0.5	0	4	4	8
2.13242	c	0.5	3.33333	3.33333	1.33333	8
1.80618	d	0.5	2.66667	2.66667	2.66667	8
1.79576	d	0.5	1.33333	3.33333	3.33333	8
0.422167	a	0.6	0	0.666667	0.333333	1
0.391991	b	0.6	0.5	0.5	0	1
0.375081	c	0.6	0	0.5	0.5	1
0.368087	d	0.6	0.416667	0.416667	0.166667	1
0.346141	e	0.6	0.166667	0.416667	0.416667	1
0.345015	e	0.6	0.333333	0.333333	0.333333	1
1.18859	a	0.6	0	2	1	3
1.07176	b	0.6	1.5	1.5	0	3
0.974215	c	0.6	0	1.5	1.5	3
0.944123	c	0.6	1.25	1.25	0.5	3
0.829615	d	0.6	1	1	1	3
0.828477	d	0.6	0.5	1.25	1.25	3
2.85001	a	0.6	0	5.33333	2.66667	8
2.45844	b	0.6	4	4	0	8
2.23656	c	0.6	0	4	4	8
2.09646	c	0.6	3.33333	3.33333	1.33333	8
1.83312	d	0.6	2.66667	2.66667	2.66667	8
1.80865	d	0.6	1.33333	3.33333	3.33333	8
0.439298	a	0.7	0	0.666667	0.333333	1
0.40638	b	0.7	0	0.5	0.5	1
0.375545	c	0.7	0.5	0.5	0	1
0.365697	d	0.7	0.166667	0.416667	0.416667	1
0.363985	d	0.7	0.416667	0.416667	0.166667	1
0.356257	e	0.7	0.333333	0.333333	0.333333	1
1.16274	a	0.7	0	2	1	3
1.02961	b	0.7	1.5	1.5	0	3
1.00339	c	0.7	0	1.5	1.5	3
0.919988	d	0.7	1.25	1.25	0.5	3
0.8405	e	0.7	0.5	1.25	1.25	3
0.829614	e	0.7	1	1	1	3
2.76585	a	0.7	0	5.33333	2.66667	8
2.43355	b	0.7	4	4	0	8
2.32202	b	0.7	0	4	4	8
2.08114	c	0.7	3.33333	3.33333	1.33333	8
1.80704	d	0.7	2.66667	2.66667	2.66667	8
1.80677	d	0.7	1.33333	3.33333	3.33333	8
0.444587	a	0.8	0	0.666667	0.333333	1
0.433105	b	0.8	0	0.5	0.5	1
0.379225	c	0.8	0.166667	0.416667	0.416667	1
0.360221	d	0.8	0.333333	0.333333	0.333333	1
0.349431	e	0.8	0.416667	0.416667	0.166667	1
0.34506	e	0.8	0.5	0.5	0	1
1.16858	a	0.8	0	2	1	3
1.03997	b	0.8	0	1.5	1.5	3
0.969555	c	0.8	1.5	1.5	0	3
0.88822	d	0.8	1.25	1.25	0.5	3
0.859838	e	0.8	0.5	1.25	1.25	3
0.834123	f	0.8	1	1	1	3
2.61093	a	0.8	0	5.33333	2.66667	8
2.32357	b	0.8	4	4	0	8
2.32233	b	0.8	0	4	4	8
1.98179	c	0.8	3.33333	3.33333	1.33333	8
1.83435	d	0.8	1.33333	3.33333	3.33333	8
1.7981	d	0.8	2.66667	2.66667	2.66667	8
0.452876	a	0.9	0	0.5	0.5	1
0.440981	a	0.9	0	0.666667	0.333333	1
0.386991	b	0.9	0.166667	0.416667	0.416667	1
0.358428	c	0.9	0.333333	0.333333	0.333333	1
0.325943	d	0.9	0.416667	0.416667	0.166667	1
0.299122	e	0.9	0.5	0.5	0	1
1.1646	a	0.9	0	2	1	3
1.09514	b	0.9	0	1.5	1.5	3
0.892412	c	0.9	1.5	1.5	0	3
0.890998	c	0.9	0.5	1.25	1.25	3
0.846197	d	0.9	1.25	1.25	0.5	3
0.835976	d	0.9	1	1	1	3
2.7239	a	0.9	0	5.33333	2.66667	8
2.45218	b	0.9	0	4	4	8
2.16433	c	0.9	4	4	0	8
1.91098	d	0.9	3.33333	3.33333	1.33333	8
1.86579	d	0.9	1.33333	3.33333	3.33333	8
1.78643	d	0.9	2.66667	2.66667	2.66667	8
0.463419	a	1	0	0.5	0.5	1
0.426208	b	1	0	0.666667	0.333333	1
0.391895	c	1	0.166667	0.416667	0.416667	1
0.353034	d	1	0.333333	0.333333	0.333333	1
0.293905	e	1	0.416667	0.416667	0.166667	1
0.240514	f	1	0.5	0.5	0	1
1.13738	a	1	0	1.5	1.5	3
1.13455	a	1	0	2	1	3
0.904327	b	1	0.5	1.25	1.25	3
0.838613	c	1	1	1	1	3
0.803646	cd	1	1.25	1.25	0.5	3
0.799811	d	1	1.5	1.5	0	3
2.6435	a	1	0	5.33333	2.66667	8
2.44288	b	1	0	4	4	8
2.02727	c	1	4	4	0	8
1.89056	d	1	1.33333	3.33333	3.33333	8
1.82684	d	1	3.33333	3.33333	1.33333	8
1.77884	d	1	2.66667	2.66667	2.66667	8
0.471778	a	1.1	0	0.5	0.5	1
0.402078	b	1.1	0	0.666667	0.333333	1
0.394321	b	1.1	0.166667	0.416667	0.416667	1
0.34434	c	1.1	0.333333	0.333333	0.333333	1
0.260033	d	1.1	0.416667	0.416667	0.166667	1
0.177331	e	1.1	0.5	0.5	0	1
1.18604	a	1.1	0	1.5	1.5	3
1.12503	b	1.1	0	2	1	3
0.940884	c	1.1	0.5	1.25	1.25	3
0.842705	d	1.1	1	1	1	3
0.755245	e	1.1	1.25	1.25	0.5	3
0.701755	f	1.1	1.5	1.5	0	3
2.70489	a	1.1	0	5.33333	2.66667	8
2.50317	b	1.1	0	4	4	8
1.93539	c	1.1	1.33333	3.33333	3.33333	8
1.88624	cd	1.1	4	4	0	8
1.77836	d	1.1	2.66667	2.66667	2.66667	8
1.73561	d	1.1	3.33333	3.33333	1.33333	8
0.476839	a	1.2	0	0.5	0.5	1
0.395705	b	1.2	0.166667	0.416667	0.416667	1
0.380938	b	1.2	0	0.666667	0.333333	1
0.337023	c	1.2	0.333333	0.333333	0.333333	1
0.229935	d	1.2	0.416667	0.416667	0.166667	1
0.123689	e	1.2	0.5	0.5	0	1
1.21866	a	1.2	0	1.5	1.5	3
1.0972	b	1.2	0	2	1	3
0.964367	c	1.2	0.5	1.25	1.25	3
0.842556	d	1.2	1	1	1	3
0.706629	e	1.2	1.25	1.25	0.5	3
0.60202	f	1.2	1.5	1.5	0	3
2.70034	a	1.2	0	4	4	8
2.6626	a	1.2	0	5.33333	2.66667	8
2.02532	b	1.2	1.33333	3.33333	3.33333	8
1.79787	c	1.2	2.66667	2.66667	2.66667	8
1.75472	c	1.2	4	4	0	8
1.67628	c	1.2	3.33333	3.33333	1.33333	8
0.48182	a	1.3	0	0.5	0.5	1
0.398059	b	1.3	0.166667	0.416667	0.416667	1
0.363334	bc	1.3	0	0.666667	0.333333	1
0.332215	c	1.3	0.333333	0.333333	0.333333	1
0.207585	d	1.3	0.416667	0.416667	0.166667	1
0.0795872	e	1.3	0.5	0.5	0	1
1.26144	a	1.3	0	1.5	1.5	3
1.08342	b	1.3	0	2	1	3
0.99516	c	1.3	0.5	1.25	1.25	3
0.848955	d	1.3	1	1	1	3
0.661374	e	1.3	1.25	1.25	0.5	3
0.501451	f	1.3	1.5	1.5	0	3
2.6891	a	1.3	0	4	4	8
2.5874	a	1.3	0	5.33333	2.66667	8
2.08116	b	1.3	1.33333	3.33333	3.33333	8
1.82371	c	1.3	2.66667	2.66667	2.66667	8
1.62371	d	1.3	3.33333	3.33333	1.33333	8
1.55467	d	1.3	4	4	0	8
0.487369	a	1.4	0	0.5	0.5	1
0.402292	b	1.4	0.166667	0.416667	0.416667	1
0.352192	c	1.4	0	0.666667	0.333333	1
0.328771	c	1.4	0.333333	0.333333	0.333333	1
0.190446	d	1.4	0.416667	0.416667	0.166667	1
0.0492277	e	1.4	0.5	0.5	0	1
1.30438	a	1.4	0	1.5	1.5	3
1.05123	b	1.4	0	2	1	3
1.03111	b	1.4	0.5	1.25	1.25	3
0.861326	c	1.4	1	1	1	3
0.622875	d	1.4	1.25	1.25	0.5	3
0.403808	e	1.4	1.5	1.5	0	3
3.04255	a	1.4	0	4	4	8
2.57089	b	1.4	0	5.33333	2.66667	8
2.14014	c	1.4	1.33333	3.33333	3.33333	8
1.8467	d	1.4	2.66667	2.66667	2.66667	8
1.54671	e	1.4	3.33333	3.33333	1.33333	8
1.4242	e	1.4	4	4	0	8
0.491049	a	1.5	0	0.5	0.5	1
0.406142	b	1.5	0.166667	0.416667	0.416667	1
0.343347	c	1.5	0	0.666667	0.333333	1
0.328001	c	1.5	0.333333	0.333333	0.333333	1
0.180143	d	1.5	0.416667	0.416667	0.166667	1
0.0294373	e	1.5	0.5	0.5	0	1
1.33978	a	1.5	0	1.5	1.5	3
1.05279	b	1.5	0.5	1.25	1.25	3
1.0418	b	1.5	0	2	1	3
0.868228	c	1.5	1	1	1	3
0.588865	d	1.5	1.25	1.25	0.5	3
0.321614	e	1.5	1.5	1.5	0	3
3.02016	a	1.5	0	4	4	8
2.54496	b	1.5	0	5.33333	2.66667	8
2.24874	c	1.5	1.33333	3.33333	3.33333	8
1.89337	d	1.5	2.66667	2.66667	2.66667	8
1.48892	e	1.5	3.33333	3.33333	1.33333	8
1.26127	e	1.5	4	4	0	8
0.492269	a	1.6	0	0.5	0.5	1
0.408786	b	1.6	0.166667	0.416667	0.416667	1
0.338294	c	1.6	0	0.666667	0.333333	1
0.329511	c	1.6	0.333333	0.333333	0.333333	1
0.17437	d	1.6	0.416667	0.416667	0.166667	1
0.0168031	e	1.6	0.5	0.5	0	1
1.37474	a	1.6	0	1.5	1.5	3
1.08987	b	1.6	0.5	1.25	1.25	3
1.0294	b	1.6	0	2	1	3
0.887235	c	1.6	1	1	1	3
0.561654	d	1.6	1.25	1.25	0.5	3
0.252135	e	1.6	1.5	1.5	0	3
3.10617	a	1.6	0	4	4	8
2.53458	b	1.6	0	5.33333	2.66667	8
2.37074	b	1.6	1.33333	3.33333	3.33333	8
1.93402	c	1.6	2.66667	2.66667	2.66667	8
1.44167	d	1.6	3.33333	3.33333	1.33333	8
1.10111	e	1.6	4	4	0	8
0.494459	a	1.7	0	0.5	0.5	1
0.41261	b	1.7	0.166667	0.416667	0.416667	1
0.335593	c	1.7	0	0.666667	0.333333	1
0.329554	c	1.7	0.333333	0.333333	0.333333	1
0.170526	d	1.7	0.416667	0.416667	0.166667	1
0.00923389	e	1.7	0.5	0.5	0	1
1.3966	a	1.7	0	1.5	1.5	3
1.11745	b	1.7	0.5	1.25	1.25	3
1.00842	bc	1.7	0	2	1	3
0.902281	c	1.7	1	1	1	3
0.541715	d	1.7	1.25	1.25	0.5	3
0.188137	e	1.7	1.5	1.5	0	3
3.17625	a	1.7	0	4	4	8
2.53049	b	1.7	0	5.33333	2.66667	8
2.41114	b	1.7	1.33333	3.33333	3.33333	8
1.98401	c	1.7	2.66667	2.66667	2.66667	8
1.39857	d	1.7	3.33333	3.33333	1.33333	8
0.944973	e	1.7	4	4	0	8
0.496532	a	1.8	0	0.5	0.5	1
0.411143	b	1.8	0.166667	0.416667	0.416667	1
0.334375	c	1.8	0	0.666667	0.333333	1
0.330026	c	1.8	0.333333	0.333333	0.333333	1
0.168088	d	1.8	0.416667	0.416667	0.166667	1
0.00498655	e	1.8	0.5	0.5	0	1
1.40452	a	1.8	0	1.5	1.5	3
1.14479	b	1.8	0.5	1.25	1.25	3
1.00455	c	1.8	0	2	1	3
0.918177	c	1.8	1	1	1	3
0.52805	d	1.8	1.25	1.25	0.5	3
0.138683	e	1.8	1.5	1.5	0	3
3.19026	a	1.8	0	4	4	8
2.5685	b	1.8	0	5.33333	2.66667	8
2.47775	b	1.8	1.33333	3.33333	3.33333	8
2.02693	c	1.8	2.66667	2.66667	2.66667	8
1.36227	d	1.8	3.33333	3.33333	1.33333	8
0.804639	e	1.8	4	4	0	8
0.495196	a	1.9	0	0.5	0.5	1
0.415622	b	1.9	0.166667	0.416667	0.416667	1
0.335553	c	1.9	0	0.666667	0.333333	1
0.334113	c	1.9	0.333333	0.333333	0.333333	1
0.167454	d	1.9	0.416667	0.416667	0.166667	1
0.00260964	e	1.9	0.5	0.5	0	1
1.41918	a	1.9	0	1.5	1.5	3
1.17158	b	1.9	0.5	1.25	1.25	3
0.997258	c	1.9	0	2	1	3
0.933449	c	1.9	1	1	1	3
0.518135	d	1.9	1.25	1.25	0.5	3
0.10032	e	1.9	1.5	1.5	0	3
3.46337	a	1.9	0	4	4	8
2.64191	b	1.9	1.33333	3.33333	3.33333	8
2.51591	b	1.9	0	5.33333	2.66667	8
2.13208	c	1.9	2.66667	2.66667	2.66667	8
1.32394	d	1.9	3.33333	3.33333	1.33333	8
0.651119	e	1.9	4	4	0	8

## Sheet: TA_YXY_ComparingEqualWTexperime
mean	group	MeanA	Var1	Var2	VarA	SumVar
0.951727	a	0.1	0.5	0.5	0	1
0.940073	b	0.1	0.416667	0.416667	0.166667	1
0.912701	c	0.1	0.333333	0.333333	0.333333	1
0.908532	c	0.1	0	0.666667	0.333333	1
0.89574	d	0.1	0.166667	0.416667	0.416667	1
0.872427	e	0.1	0	0.5	0.5	1
1.2903	a	0.1	1.5	1.5	0	3
1.27293	a	0.1	1.25	1.25	0.5	3
1.21122	b	0.1	1	1	1	3
1.16521	c	0.1	0.5	1.25	1.25	3
1.15926	c	0.1	0	2	1	3
1.09717	d	0.1	0	1.5	1.5	3
1.79489	a	0.1	4	4	0	8
1.76144	a	0.1	3.33333	3.33333	1.33333	8
1.64329	b	0.1	2.66667	2.66667	2.66667	8
1.56833	c	0.1	1.33333	3.33333	3.33333	8
1.48348	d	0.1	0	5.33333	2.66667	8
1.39205	e	0.1	0	4	4	8
1.03973	a	0.2	0.416667	0.416667	0.166667	1
1.03673	ab	0.2	0.5	0.5	0	1
1.03129	bc	0.2	0.333333	0.333333	0.333333	1
1.02737	c	0.2	0	0.666667	0.333333	1
1.01649	d	0.2	0.166667	0.416667	0.416667	1
0.999566	e	0.2	0	0.5	0.5	1
1.40606	a	0.2	1.25	1.25	0.5	3
1.376	b	0.2	1.5	1.5	0	3
1.36161	b	0.2	1	1	1	3
1.3265	c	0.2	0.5	1.25	1.25	3
1.30489	d	0.2	0	2	1	3
1.25375	e	0.2	0	1.5	1.5	3
1.92753	a	0.2	3.33333	3.33333	1.33333	8
1.88101	b	0.2	4	4	0	8
1.82725	c	0.2	2.66667	2.66667	2.66667	8
1.73937	d	0.2	1.33333	3.33333	3.33333	8
1.65694	e	0.2	0	5.33333	2.66667	8
1.5744	f	0.2	0	4	4	8
1.14143	a	0.3	0.333333	0.333333	0.333333	1
1.14096	a	0.3	0.166667	0.416667	0.416667	1
1.13613	ab	0.3	0	0.666667	0.333333	1
1.13304	bc	0.3	0.416667	0.416667	0.166667	1
1.12938	c	0.3	0	0.5	0.5	1
1.1227	d	0.3	0.5	0.5	0	1
1.53876	a	0.3	1.25	1.25	0.5	3
1.51179	b	0.3	1	1	1	3
1.47868	c	0.3	0.5	1.25	1.25	3
1.46268	cd	0.3	1.5	1.5	0	3
1.45191	d	0.3	0	2	1	3
1.41115	e	0.3	0	1.5	1.5	3
2.09464	a	0.3	3.33333	3.33333	1.33333	8
2.01903	b	0.3	2.66667	2.66667	2.66667	8
1.97572	c	0.3	4	4	0	8
1.92964	d	0.3	1.33333	3.33333	3.33333	8
1.83417	e	0.3	0	5.33333	2.66667	8
1.74733	f	0.3	0	4	4	8
1.26292	a	0.4	0.166667	0.416667	0.416667	1
1.25974	ab	0.4	0	0.5	0.5	1
1.25704	ab	0.4	0.333333	0.333333	0.333333	1
1.25157	b	0.4	0	0.666667	0.333333	1
1.23202	c	0.4	0.416667	0.416667	0.166667	1
1.21004	d	0.4	0.5	0.5	0	1
1.67436	a	0.4	1.25	1.25	0.5	3
1.6674	a	0.4	1	1	1	3
1.6444	b	0.4	0.5	1.25	1.25	3
1.60671	c	0.4	0	2	1	3
1.58416	d	0.4	0	1.5	1.5	3
1.5537	e	0.4	1.5	1.5	0	3
2.27631	a	0.4	3.33333	3.33333	1.33333	8
2.2082	b	0.4	2.66667	2.66667	2.66667	8
2.1258	c	0.4	1.33333	3.33333	3.33333	8
2.0843	d	0.4	4	4	0	8
1.99205	e	0.4	0	5.33333	2.66667	8
1.94516	f	0.4	0	4	4	8
1.40089	a	0.5	0	0.5	0.5	1
1.39373	a	0.5	0.166667	0.416667	0.416667	1
1.38047	b	0.5	0.333333	0.333333	0.333333	1
1.37419	b	0.5	0	0.666667	0.333333	1
1.33668	c	0.5	0.416667	0.416667	0.166667	1
1.29925	d	0.5	0.5	0.5	0	1
1.83711	a	0.5	1	1	1	3
1.82322	a	0.5	1.25	1.25	0.5	3
1.82059	a	0.5	0.5	1.25	1.25	3
1.77477	b	0.5	0	2	1	3
1.76023	b	0.5	0	1.5	1.5	3
1.65889	c	0.5	1.5	1.5	0	3
2.47777	a	0.5	3.33333	3.33333	1.33333	8
2.42153	b	0.5	2.66667	2.66667	2.66667	8
2.33088	c	0.5	1.33333	3.33333	3.33333	8
2.22951	d	0.5	4	4	0	8
2.19518	d	0.5	0	5.33333	2.66667	8
2.13929	e	0.5	0	4	4	8
1.55282	a	0.6	0	0.5	0.5	1
1.54328	a	0.6	0.166667	0.416667	0.416667	1
1.51924	b	0.6	0	0.666667	0.333333	1
1.51766	b	0.6	0.333333	0.333333	0.333333	1
1.45744	c	0.6	0.416667	0.416667	0.166667	1
1.39186	d	0.6	0.5	0.5	0	1
2.03095	a	0.6	1	1	1	3
2.01419	ab	0.6	0.5	1.25	1.25	3
2.00122	b	0.6	1.25	1.25	0.5	3
1.95889	c	0.6	0	2	1	3
1.95726	c	0.6	0	1.5	1.5	3
1.78382	d	0.6	1.5	1.5	0	3
2.69638	a	0.6	3.33333	3.33333	1.33333	8
2.64774	b	0.6	2.66667	2.66667	2.66667	8
2.5579	c	0.6	1.33333	3.33333	3.33333	8
2.42387	d	0.6	4	4	0	8
2.39886	d	0.6	0	5.33333	2.66667	8
2.35241	e	0.6	0	4	4	8
1.73492	a	0.7	0	0.5	0.5	1
1.72169	a	0.7	0.166667	0.416667	0.416667	1
1.69353	b	0.7	0	0.666667	0.333333	1
1.69045	b	0.7	0.333333	0.333333	0.333333	1
1.60985	c	0.7	0.416667	0.416667	0.166667	1
1.502	d	0.7	0.5	0.5	0	1
2.24911	a	0.7	1	1	1	3
2.23098	ab	0.7	0.5	1.25	1.25	3
2.20316	bc	0.7	1.25	1.25	0.5	3
2.18408	c	0.7	0	1.5	1.5	3
2.17677	c	0.7	0	2	1	3
1.96022	d	0.7	1.5	1.5	0	3
2.9521	a	0.7	3.33333	3.33333	1.33333	8
2.90591	b	0.7	2.66667	2.66667	2.66667	8
2.79617	c	0.7	1.33333	3.33333	3.33333	8
2.67825	d	0.7	4	4	0	8
2.62731	e	0.7	0	5.33333	2.66667	8
2.59134	e	0.7	0	4	4	8
1.97722	a	0.8	0	0.5	0.5	1
1.95465	ab	0.8	0.166667	0.416667	0.416667	1
1.92526	bc	0.8	0	0.666667	0.333333	1
1.91183	c	0.8	0.333333	0.333333	0.333333	1
1.81019	d	0.8	0.416667	0.416667	0.166667	1
1.65496	e	0.8	0.5	0.5	0	1
2.50985	a	0.8	1	1	1	3
2.48959	a	0.8	0.5	1.25	1.25	3
2.45216	b	0.8	1.25	1.25	0.5	3
2.43918	b	0.8	0	1.5	1.5	3
2.42644	b	0.8	0	2	1	3
2.20585	c	0.8	1.5	1.5	0	3
3.23413	a	0.8	3.33333	3.33333	1.33333	8
3.18301	b	0.8	2.66667	2.66667	2.66667	8
3.08288	c	0.8	1.33333	3.33333	3.33333	8
2.99692	d	0.8	4	4	0	8
2.89159	e	0.8	0	5.33333	2.66667	8
2.8595	e	0.8	0	4	4	8
2.29301	a	0.9	0	0.5	0.5	1
2.25565	b	0.9	0.166667	0.416667	0.416667	1
2.24871	b	0.9	0	0.666667	0.333333	1
2.2046	c	0.9	0.333333	0.333333	0.333333	1
2.09884	d	0.9	0.416667	0.416667	0.166667	1
1.91328	e	0.9	0.5	0.5	0	1
2.80545	a	0.9	1	1	1	3
2.78483	ab	0.9	0.5	1.25	1.25	3
2.77086	bc	0.9	1.25	1.25	0.5	3
2.74697	c	0.9	0	1.5	1.5	3
2.74219	c	0.9	0	2	1	3
2.54546	d	0.9	1.5	1.5	0	3
3.56232	a	0.9	3.33333	3.33333	1.33333	8
3.49	b	0.9	2.66667	2.66667	2.66667	8
3.39623	c	0.9	1.33333	3.33333	3.33333	8
3.38632	c	0.9	4	4	0	8
3.18362	d	0.9	0	5.33333	2.66667	8
3.16385	d	0.9	0	4	4	8
2.74895	a	1	0	0.5	0.5	1
2.72508	a	1	0	0.666667	0.333333	1
2.66986	b	1	0.166667	0.416667	0.416667	1
2.61858	c	1	0.333333	0.333333	0.333333	1
2.51556	d	1	0.416667	0.416667	0.166667	1
2.33825	e	1	0.5	0.5	0	1
3.17956	a	1	1	1	1	3
3.16125	ab	1	1.25	1.25	0.5	3
3.14882	bc	1	0.5	1.25	1.25	3
3.13034	c	1	0	2	1	3
3.12674	c	1	0	1.5	1.5	3
2.98935	d	1	1.5	1.5	0	3
3.92416	a	1	3.33333	3.33333	1.33333	8
3.85883	b	1	4	4	0	8
3.85451	b	1	2.66667	2.66667	2.66667	8
3.73135	c	1	1.33333	3.33333	3.33333	8
3.5468	d	1	0	5.33333	2.66667	8
3.49365	e	1	0	4	4	8
3.43616	a	1.1	0	0.666667	0.333333	1
3.38395	b	1.1	0	0.5	0.5	1
3.24834	c	1.1	0.166667	0.416667	0.416667	1
3.1828	d	1.1	0.333333	0.333333	0.333333	1
3.10231	e	1.1	0.416667	0.416667	0.166667	1
2.96589	f	1.1	0.5	0.5	0	1
3.64576	a	1.1	0	2	1	3
3.63054	a	1.1	1	1	1	3
3.62529	ab	1.1	1.25	1.25	0.5	3
3.60328	bc	1.1	0.5	1.25	1.25	3
3.60034	c	1.1	0	1.5	1.5	3
3.54672	d	1.1	1.5	1.5	0	3
4.39511	a	1.1	4	4	0	8
4.36967	a	1.1	3.33333	3.33333	1.33333	8
4.26792	b	1.1	2.66667	2.66667	2.66667	8
4.14373	c	1.1	1.33333	3.33333	3.33333	8
3.95929	d	1.1	0	5.33333	2.66667	8
3.87804	e	1.1	0	4	4	8
4.47704	a	1.2	0	0.666667	0.333333	1
4.3116	b	1.2	0	0.5	0.5	1
4.04827	c	1.2	0.166667	0.416667	0.416667	1
3.95028	d	1.2	0.333333	0.333333	0.333333	1
3.9123	d	1.2	0.416667	0.416667	0.166667	1
3.84425	e	1.2	0.5	0.5	0	1
4.32881	a	1.2	0	2	1	3
4.25041	b	1.2	1.5	1.5	0	3
4.23446	b	1.2	1.25	1.25	0.5	3
4.21968	b	1.2	0	1.5	1.5	3
4.17534	c	1.2	1	1	1	3
4.1413	d	1.2	0.5	1.25	1.25	3
5.04362	a	1.2	4	4	0	8
4.90092	b	1.2	3.33333	3.33333	1.33333	8
4.74208	c	1.2	2.66667	2.66667	2.66667	8
4.57571	d	1.2	1.33333	3.33333	3.33333	8
4.45129	e	1.2	0	5.33333	2.66667	8
4.34229	f	1.2	0	4	4	8
5.98454	a	1.3	0	0.666667	0.333333	1
5.67239	b	1.3	0	0.5	0.5	1
5.16901	c	1.3	0.166667	0.416667	0.416667	1
5.01364	d	1.3	0.333333	0.333333	0.333333	1
5.0106	d	1.3	0.5	0.5	0	1
4.99212	d	1.3	0.416667	0.416667	0.166667	1
5.2468	a	1.3	0	2	1	3
5.055	b	1.3	1.5	1.5	0	3
5.00591	c	1.3	0	1.5	1.5	3
4.96158	c	1.3	1.25	1.25	0.5	3
4.85923	d	1.3	1	1	1	3
4.79523	e	1.3	0.5	1.25	1.25	3
5.73821	a	1.3	4	4	0	8
5.51152	b	1.3	3.33333	3.33333	1.33333	8
5.27643	c	1.3	2.66667	2.66667	2.66667	8
5.07454	d	1.3	1.33333	3.33333	3.33333	8
5.07186	d	1.3	0	5.33333	2.66667	8
4.90676	e	1.3	0	4	4	8
8.1816	a	1.4	0	0.666667	0.333333	1
7.65609	b	1.4	0	0.5	0.5	1
6.73559	c	1.4	0.166667	0.416667	0.416667	1
6.47717	d	1.4	0.5	0.5	0	1
6.42392	d	1.4	0.416667	0.416667	0.166667	1
6.3869	d	1.4	0.333333	0.333333	0.333333	1
6.45392	a	1.4	0	2	1	3
6.0756	b	1.4	0	1.5	1.5	3
6.05294	b	1.4	1.5	1.5	0	3
5.81455	c	1.4	1.25	1.25	0.5	3
5.65342	d	1.4	1	1	1	3
5.61261	d	1.4	0.5	1.25	1.25	3
6.54095	a	1.4	4	4	0	8
6.15237	b	1.4	3.33333	3.33333	1.33333	8
5.90992	c	1.4	2.66667	2.66667	2.66667	8
5.81156	c	1.4	0	5.33333	2.66667	8
5.65412	d	1.4	1.33333	3.33333	3.33333	8
5.592	d	1.4	0	4	4	8
11.3173	a	1.5	0	0.666667	0.333333	1
10.572	b	1.5	0	0.5	0.5	1
8.77054	c	1.5	0.166667	0.416667	0.416667	1
8.34031	d	1.5	0.5	0.5	0	1
8.26372	d	1.5	0.333333	0.333333	0.333333	1
8.22006	d	1.5	0.416667	0.416667	0.166667	1
8.031	a	1.5	0	2	1	3
7.47451	b	1.5	0	1.5	1.5	3
7.14337	c	1.5	1.5	1.5	0	3
6.80314	d	1.5	1.25	1.25	0.5	3
6.626	e	1.5	1	1	1	3
6.58776	e	1.5	0.5	1.25	1.25	3
7.46064	a	1.5	4	4	0	8
6.92767	b	1.5	3.33333	3.33333	1.33333	8
6.76282	c	1.5	0	5.33333	2.66667	8
6.61795	d	1.5	2.66667	2.66667	2.66667	8
6.37208	e	1.5	0	4	4	8
6.31548	e	1.5	1.33333	3.33333	3.33333	8
15.6788	a	1.6	0	0.666667	0.333333	1
14.8472	b	1.6	0	0.5	0.5	1
11.665	c	1.6	0.166667	0.416667	0.416667	1
10.6274	d	1.6	0.333333	0.333333	0.333333	1
10.5537	d	1.6	0.416667	0.416667	0.166667	1
10.5241	d	1.6	0.5	0.5	0	1
10.15	a	1.6	0	2	1	3
9.3119	b	1.6	0	1.5	1.5	3
8.37811	c	1.6	1.5	1.5	0	3
8.04659	d	1.6	1.25	1.25	0.5	3
7.73607	e	1.6	1	1	1	3
7.7239	e	1.6	0.5	1.25	1.25	3
8.44647	a	1.6	4	4	0	8
7.89649	b	1.6	0	5.33333	2.66667	8
7.81048	b	1.6	3.33333	3.33333	1.33333	8
7.4147	c	1.6	2.66667	2.66667	2.66667	8
7.38448	c	1.6	0	4	4	8
7.07496	d	1.6	1.33333	3.33333	3.33333	8
21.3111	a	1.7	0	0.666667	0.333333	1
20.9713	a	1.7	0	0.5	0.5	1
15.2234	b	1.7	0.166667	0.416667	0.416667	1
13.7731	c	1.7	0.333333	0.333333	0.333333	1
13.3386	c	1.7	0.5	0.5	0	1
13.3219	c	1.7	0.416667	0.416667	0.166667	1
12.8677	a	1.7	0	2	1	3
11.828	b	1.7	0	1.5	1.5	3
9.86473	c	1.7	1.5	1.5	0	3
9.44328	d	1.7	1.25	1.25	0.5	3
9.14249	e	1.7	1	1	1	3
9.10844	e	1.7	0.5	1.25	1.25	3
9.47816	a	1.7	4	4	0	8
9.34281	a	1.7	0	5.33333	2.66667	8
8.74496	b	1.7	3.33333	3.33333	1.33333	8
8.62256	b	1.7	0	4	4	8
8.33063	c	1.7	2.66667	2.66667	2.66667	8
7.95736	d	1.7	1.33333	3.33333	3.33333	8
29.5288	a	1.8	0	0.5	0.5	1
28.8386	a	1.8	0	0.666667	0.333333	1
20.0462	b	1.8	0.166667	0.416667	0.416667	1
17.2916	c	1.8	0.333333	0.333333	0.333333	1
16.6504	c	1.8	0.416667	0.416667	0.166667	1
16.1715	c	1.8	0.5	0.5	0	1
16.2437	a	1.8	0	2	1	3
15.1068	b	1.8	0	1.5	1.5	3
11.4936	c	1.8	1.5	1.5	0	3
11.0456	cd	1.8	1.25	1.25	0.5	3
10.7568	d	1.8	0.5	1.25	1.25	3
10.7038	d	1.8	1	1	1	3
11.1874	a	1.8	0	5.33333	2.66667	8
10.7865	b	1.8	4	4	0	8
10.3266	c	1.8	0	4	4	8
9.84815	d	1.8	3.33333	3.33333	1.33333	8
9.43636	e	1.8	2.66667	2.66667	2.66667	8
8.91292	f	1.8	1.33333	3.33333	3.33333	8
40.3843	a	1.9	0	0.5	0.5	1
38.6719	a	1.9	0	0.666667	0.333333	1
25.8004	b	1.9	0.166667	0.416667	0.416667	1
21.8008	c	1.9	0.333333	0.333333	0.333333	1
20.3869	c	1.9	0.416667	0.416667	0.166667	1
19.7089	c	1.9	0.5	0.5	0	1
20.2867	a	1.9	0	2	1	3
19.2592	b	1.9	0	1.5	1.5	3
13.2148	c	1.9	1.5	1.5	0	3
12.696	c	1.9	1.25	1.25	0.5	3
12.6686	c	1.9	0.5	1.25	1.25	3
12.5081	c	1.9	1	1	1	3
13.3492	a	1.9	0	5.33333	2.66667	8
12.1216	b	1.9	0	4	4	8
12.0326	b	1.9	4	4	0	8
11.091	c	1.9	3.33333	3.33333	1.33333	8
10.5545	d	1.9	2.66667	2.66667	2.66667	8
10.0048	e	1.9	1.33333	3.33333	3.33333	8

## Sheet: TH_XYY_ComparingEqualVTexperime
mean	group	Mean1	VarA	Var2	Var1	SumVar
0.593407	a	1	1	1	1	3
0.59297	a	1.1	1	1	1	3
0.5894	ab	0.9	1	1	1	3
0.587697	ab	1.2	1	1	1	3
0.582178	abc	0.8	1	1	1	3
0.577915	bc	1.3	1	1	1	3
0.571447	cd	0.7	1	1	1	3
0.563608	de	1.4	1	1	1	3
0.557387	ef	0.6	1	1	1	3
0.547745	fg	1.5	1	1	1	3
0.541947	g	0.5	1	1	1	3
0.528226	h	1.6	1	1	1	3
0.523763	h	0.4	1	1	1	3
0.50828	i	1.7	1	1	1	3
0.502741	i	0.3	1	1	1	3
0.487407	j	1.8	1	1	1	3
0.480412	j	0.2	1	1	1	3
0.46769	k	1.9	1	1	1	3
0.452865	l	0.1	1	1	1	3
0.646384	a	0.9	1.5	1.5	0	3
0.645888	a	0.8	1.5	1.5	0	3
0.641293	ab	1	1.5	1.5	0	3
0.637926	ab	0.7	1.5	1.5	0	3
0.630649	b	1.1	1.5	1.5	0	3
0.627737	b	0.6	1.5	1.5	0	3
0.6137	c	0.5	1.5	1.5	0	3
0.612693	c	1.2	1.5	1.5	0	3
0.599863	d	0.4	1.5	1.5	0	3
0.592528	de	1.3	1.5	1.5	0	3
0.584966	e	0.3	1.5	1.5	0	3
0.571641	f	0.2	1.5	1.5	0	3
0.570017	fg	1.4	1.5	1.5	0	3
0.55786	gh	0.1	1.5	1.5	0	3
0.546127	h	1.5	1.5	1.5	0	3
0.523075	i	1.6	1.5	1.5	0	3
0.50013	j	1.7	1.5	1.5	0	3
0.477538	k	1.8	1.5	1.5	0	3
0.456466	l	1.9	1.5	1.5	0	3
0.588262	a	1.1	0	1.5	1.5	3
0.585613	a	1.2	0	1.5	1.5	3
0.585336	a	1	0	1.5	1.5	3
0.57868	ab	0.9	0	1.5	1.5	3
0.577648	ab	1.3	0	1.5	1.5	3
0.568979	bc	0.8	0	1.5	1.5	3
0.565792	bc	1.4	0	1.5	1.5	3
0.556839	cd	0.7	0	1.5	1.5	3
0.548237	de	1.5	0	1.5	1.5	3
0.541966	e	0.6	0	1.5	1.5	3
0.527599	f	1.6	0	1.5	1.5	3
0.526158	f	0.5	0	1.5	1.5	3
0.507973	g	0.4	0	1.5	1.5	3
0.505142	g	1.7	0	1.5	1.5	3
0.489094	h	0.3	0	1.5	1.5	3
0.4824	h	1.8	0	1.5	1.5	3
0.467517	i	0.2	0	1.5	1.5	3
0.460445	i	1.9	0	1.5	1.5	3
0.441215	j	0.1	0	1.5	1.5	3
0.609459	a	1	1.25	1.25	0.5	3
0.609055	a	0.9	1.25	1.25	0.5	3
0.604298	a	1.1	1.25	1.25	0.5	3
0.603448	a	0.8	1.25	1.25	0.5	3
0.59528	ab	1.2	1.25	1.25	0.5	3
0.59456	ab	0.7	1.25	1.25	0.5	3
0.58178	b	0.6	1.25	1.25	0.5	3
0.581409	b	1.3	1.25	1.25	0.5	3
0.567032	c	0.5	1.25	1.25	0.5	3
0.564059	c	1.4	1.25	1.25	0.5	3
0.548948	d	0.4	1.25	1.25	0.5	3
0.544866	d	1.5	1.25	1.25	0.5	3
0.527365	e	0.3	1.25	1.25	0.5	3
0.524358	e	1.6	1.25	1.25	0.5	3
0.504089	f	0.2	1.25	1.25	0.5	3
0.503035	f	1.7	1.25	1.25	0.5	3
0.481278	g	1.8	1.25	1.25	0.5	3
0.473049	gh	0.1	1.25	1.25	0.5	3
0.461063	h	1.9	1.25	1.25	0.5	3
0.583168	a	1.1	0.5	1.25	1.25	3
0.582697	a	1	0.5	1.25	1.25	3
0.579566	a	1.2	0.5	1.25	1.25	3
0.578237	a	0.9	0.5	1.25	1.25	3
0.570973	ab	1.3	0.5	1.25	1.25	3
0.570352	abc	0.8	0.5	1.25	1.25	3
0.559748	bc	0.7	0.5	1.25	1.25	3
0.557763	cd	1.4	0.5	1.25	1.25	3
0.54617	de	0.6	0.5	1.25	1.25	3
0.542358	ef	1.5	0.5	1.25	1.25	3
0.531083	fg	0.5	0.5	1.25	1.25	3
0.523521	gh	1.6	0.5	1.25	1.25	3
0.513308	hi	0.4	0.5	1.25	1.25	3
0.503739	ij	1.7	0.5	1.25	1.25	3
0.492817	jk	0.3	0.5	1.25	1.25	3
0.483168	kl	1.8	0.5	1.25	1.25	3
0.471399	lm	0.2	0.5	1.25	1.25	3
0.46254	m	1.9	0.5	1.25	1.25	3
0.445167	n	0.1	0.5	1.25	1.25	3
0.75159	a	1	0.333333	0.333333	0.333333	1
0.747096	a	0.9	0.333333	0.333333	0.333333	1
0.746202	a	1.1	0.333333	0.333333	0.333333	1
0.735026	ab	0.8	0.333333	0.333333	0.333333	1
0.730043	ab	1.2	0.333333	0.333333	0.333333	1
0.718127	bc	0.7	0.333333	0.333333	0.333333	1
0.704684	c	1.3	0.333333	0.333333	0.333333	1
0.69782	c	0.6	0.333333	0.333333	0.333333	1
0.675706	d	0.5	0.333333	0.333333	0.333333	1
0.673342	d	1.4	0.333333	0.333333	0.333333	1
0.650577	e	0.4	0.333333	0.333333	0.333333	1
0.63979	ef	1.5	0.333333	0.333333	0.333333	1
0.6225	fg	0.3	0.333333	0.333333	0.333333	1
0.606165	gh	1.6	0.333333	0.333333	0.333333	1
0.590646	hi	0.2	0.333333	0.333333	0.333333	1
0.574337	i	1.7	0.333333	0.333333	0.333333	1
0.550609	j	0.1	0.333333	0.333333	0.333333	1
0.544467	j	1.8	0.333333	0.333333	0.333333	1
0.516803	k	1.9	0.333333	0.333333	0.333333	1
0.774281	a	1	0.5	0.5	0	1
0.772678	a	0.9	0.5	0.5	0	1
0.761729	a	1.1	0.5	0.5	0	1
0.759363	ab	0.8	0.5	0.5	0	1
0.740567	bc	0.7	0.5	0.5	0	1
0.735745	cd	1.2	0.5	0.5	0	1
0.720107	de	0.6	0.5	0.5	0	1
0.702763	ef	1.3	0.5	0.5	0	1
0.699602	f	0.5	0.5	0.5	0	1
0.679558	g	0.4	0.5	0.5	0	1
0.667339	g	1.4	0.5	0.5	0	1
0.660105	gh	0.3	0.5	0.5	0	1
0.641636	hi	0.2	0.5	0.5	0	1
0.631097	i	1.5	0.5	0.5	0	1
0.624494	i	0.1	0.5	0.5	0	1
0.59724	j	1.6	0.5	0.5	0	1
0.565199	k	1.7	0.5	0.5	0	1
0.535859	l	1.8	0.5	0.5	0	1
0.508722	m	1.9	0.5	0.5	0	1
0.749484	a	1	0	0.5	0.5	1
0.749027	a	1.1	0	0.5	0.5	1
0.741779	a	0.9	0	0.5	0.5	1
0.734058	a	1.2	0	0.5	0.5	1
0.726901	ab	0.8	0	0.5	0.5	1
0.708202	bc	0.7	0	0.5	0.5	1
0.70793	bc	1.3	0	0.5	0.5	1
0.686479	cd	0.6	0	0.5	0.5	1
0.673579	de	1.4	0	0.5	0.5	1
0.663173	e	0.5	0	0.5	0.5	1
0.637091	f	1.5	0	0.5	0.5	1
0.636408	f	0.4	0	0.5	0.5	1
0.607645	g	0.3	0	0.5	0.5	1
0.60217	g	1.6	0	0.5	0.5	1
0.575489	h	0.2	0	0.5	0.5	1
0.569141	h	1.7	0	0.5	0.5	1
0.539191	i	1.8	0	0.5	0.5	1
0.536766	i	0.1	0	0.5	0.5	1
0.511219	j	1.9	0	0.5	0.5	1
0.760485	a	1	0.416667	0.416667	0.166667	1
0.758196	a	0.9	0.416667	0.416667	0.166667	1
0.751715	ab	1.1	0.416667	0.416667	0.166667	1
0.74663	ab	0.8	0.416667	0.416667	0.166667	1
0.73143	bc	1.2	0.416667	0.416667	0.166667	1
0.730436	bc	0.7	0.416667	0.416667	0.166667	1
0.710853	cd	0.6	0.416667	0.416667	0.166667	1
0.702744	de	1.3	0.416667	0.416667	0.166667	1
0.689863	e	0.5	0.416667	0.416667	0.166667	1
0.66941	f	1.4	0.416667	0.416667	0.166667	1
0.66751	f	0.4	0.416667	0.416667	0.166667	1
0.643071	g	0.3	0.416667	0.416667	0.166667	1
0.634964	g	1.5	0.416667	0.416667	0.166667	1
0.614416	h	0.2	0.416667	0.416667	0.166667	1
0.601497	h	1.6	0.416667	0.416667	0.166667	1
0.574982	i	0.1	0.416667	0.416667	0.166667	1
0.569563	i	1.7	0.416667	0.416667	0.166667	1
0.540022	j	1.8	0.416667	0.416667	0.166667	1
0.512423	k	1.9	0.416667	0.416667	0.166667	1
0.747937	a	1	0.166667	0.416667	0.416667	1
0.74429	a	1.1	0.166667	0.416667	0.416667	1
0.742231	a	0.9	0.166667	0.416667	0.416667	1
0.730265	ab	1.2	0.166667	0.416667	0.416667	1
0.728939	ab	0.8	0.166667	0.416667	0.416667	1
0.711581	bc	0.7	0.166667	0.416667	0.416667	1
0.705517	c	1.3	0.166667	0.416667	0.416667	1
0.690875	cd	0.6	0.166667	0.416667	0.416667	1
0.674269	de	1.4	0.166667	0.416667	0.416667	1
0.667666	e	0.5	0.166667	0.416667	0.416667	1
0.642007	f	0.4	0.166667	0.416667	0.416667	1
0.639892	f	1.5	0.166667	0.416667	0.416667	1
0.61409	g	0.3	0.166667	0.416667	0.416667	1
0.606011	g	1.6	0.166667	0.416667	0.416667	1
0.58227	h	0.2	0.166667	0.416667	0.416667	1
0.573494	h	1.7	0.166667	0.416667	0.416667	1
0.54324	i	1.8	0.166667	0.416667	0.416667	1
0.542476	i	0.1	0.166667	0.416667	0.416667	1
0.515433	j	1.9	0.166667	0.416667	0.416667	1
0.454244	a	1.1	2.66667	2.66667	2.66667	8
0.453124	ab	1.2	2.66667	2.66667	2.66667	8
0.453052	ab	1	2.66667	2.66667	2.66667	8
0.451038	abc	1.3	2.66667	2.66667	2.66667	8
0.449415	abc	0.9	2.66667	2.66667	2.66667	8
0.445293	bcd	1.4	2.66667	2.66667	2.66667	8
0.444005	cde	0.8	2.66667	2.66667	2.66667	8
0.438361	de	1.5	2.66667	2.66667	2.66667	8
0.436385	ef	0.7	2.66667	2.66667	2.66667	8
0.429797	fg	1.6	2.66667	2.66667	2.66667	8
0.427959	g	0.6	2.66667	2.66667	2.66667	8
0.419094	h	1.7	2.66667	2.66667	2.66667	8
0.417586	h	0.5	2.66667	2.66667	2.66667	8
0.408296	i	1.8	2.66667	2.66667	2.66667	8
0.406803	i	0.4	2.66667	2.66667	2.66667	8
0.396243	j	1.9	2.66667	2.66667	2.66667	8
0.393271	j	0.3	2.66667	2.66667	2.66667	8
0.379143	k	0.2	2.66667	2.66667	2.66667	8
0.363009	l	0.1	2.66667	2.66667	2.66667	8
0.53812	a	0.7	4	4	0	8
0.537612	a	0.8	4	4	0	8
0.533964	ab	0.9	4	4	0	8
0.533652	ab	0.6	4	4	0	8
0.527927	b	1	4	4	0	8
0.526234	bc	0.5	4	4	0	8
0.518559	c	1.1	4	4	0	8
0.518061	c	0.4	4	4	0	8
0.507107	d	0.3	4	4	0	8
0.505486	d	1.2	4	4	0	8
0.495962	e	0.2	4	4	0	8
0.491552	ef	1.3	4	4	0	8
0.485244	fg	0.1	4	4	0	8
0.476574	g	1.4	4	4	0	8
0.460933	h	1.5	4	4	0	8
0.444653	i	1.6	4	4	0	8
0.428354	j	1.7	4	4	0	8
0.412768	k	1.8	4	4	0	8
0.397098	l	1.9	4	4	0	8
0.445262	a	1.2	0	4	4	8
0.444754	a	1.3	0	4	4	8
0.443006	ab	1.1	0	4	4	8
0.441325	ab	1.4	0	4	4	8
0.440685	ab	1	0	4	4	8
0.435689	bc	0.9	0	4	4	8
0.435668	bc	1.5	0	4	4	8
0.429576	cd	0.8	0	4	4	8
0.427511	de	1.6	0	4	4	8
0.421097	ef	0.7	0	4	4	8
0.416531	fg	1.7	0	4	4	8
0.413278	g	0.6	0	4	4	8
0.405179	h	1.8	0	4	4	8
0.403041	h	0.5	0	4	4	8
0.393368	i	0.4	0	4	4	8
0.391917	i	1.9	0	4	4	8
0.381452	j	0.3	0	4	4	8
0.367712	k	0.2	0	4	4	8
0.352917	l	0.1	0	4	4	8
0.47276	a	1	3.33333	3.33333	1.33333	8
0.471731	ab	1.1	3.33333	3.33333	1.33333	8
0.471569	ab	0.9	3.33333	3.33333	1.33333	8
0.467388	abc	1.2	3.33333	3.33333	1.33333	8
0.466942	abc	0.8	3.33333	3.33333	1.33333	8
0.462636	bcd	1.3	3.33333	3.33333	1.33333	8
0.46034	cde	0.7	3.33333	3.33333	1.33333	8
0.454198	de	1.4	3.33333	3.33333	1.33333	8
0.451993	ef	0.6	3.33333	3.33333	1.33333	8
0.444132	fg	1.5	3.33333	3.33333	1.33333	8
0.441004	gh	0.5	3.33333	3.33333	1.33333	8
0.433269	hi	1.6	3.33333	3.33333	1.33333	8
0.429496	i	0.4	3.33333	3.33333	1.33333	8
0.420484	j	1.7	3.33333	3.33333	1.33333	8
0.415431	jk	0.3	3.33333	3.33333	1.33333	8
0.408103	k	1.8	3.33333	3.33333	1.33333	8
0.398249	l	0.2	3.33333	3.33333	1.33333	8
0.394424	l	1.9	3.33333	3.33333	1.33333	8
0.378783	m	0.1	3.33333	3.33333	1.33333	8
0.439753	a	1.1	1.33333	3.33333	3.33333	8
0.439471	a	1.2	1.33333	3.33333	3.33333	8
0.438501	a	1	1.33333	3.33333	3.33333	8
0.437072	ab	1.3	1.33333	3.33333	3.33333	8
0.435071	ab	0.9	1.33333	3.33333	3.33333	8
0.432627	abc	1.4	1.33333	3.33333	3.33333	8
0.430086	bc	0.8	1.33333	3.33333	3.33333	8
0.426253	cd	1.5	1.33333	3.33333	3.33333	8
0.421617	de	0.7	1.33333	3.33333	3.33333	8
0.418486	ef	1.6	1.33333	3.33333	3.33333	8
0.413395	fg	0.6	1.33333	3.33333	3.33333	8
0.408723	gh	1.7	1.33333	3.33333	3.33333	8
0.405613	h	0.5	1.33333	3.33333	3.33333	8
0.397633	i	1.8	1.33333	3.33333	3.33333	8
0.395144	i	0.4	1.33333	3.33333	3.33333	8
0.386811	j	1.9	1.33333	3.33333	3.33333	8
0.383087	j	0.3	1.33333	3.33333	3.33333	8
0.369022	k	0.2	1.33333	3.33333	3.33333	8
0.352983	l	0.1	1.33333	3.33333	3.33333	8
0.595131	a	1.1	0	2	1	3
0.5933	ab	1	0	2	1	3
0.59056	ab	1.2	0	2	1	3
0.589016	ab	0.9	0	2	1	3
0.57866	bc	0.8	0	2	1	3
0.578132	bc	1.3	0	2	1	3
0.566895	cd	0.7	0	2	1	3
0.562055	d	1.4	0	2	1	3
0.553219	de	0.6	0	2	1	3
0.540749	ef	1.5	0	2	1	3
0.537142	f	0.5	0	2	1	3
0.518992	g	0.4	0	2	1	3
0.517781	g	1.6	0	2	1	3
0.499366	h	0.3	0	2	1	3
0.493882	h	1.7	0	2	1	3
0.475668	i	0.2	0	2	1	3
0.471698	i	1.8	0	2	1	3
0.449282	j	1.9	0	2	1	3
0.448517	j	0.1	0	2	1	3
0.756612	a	1	0	0.666667	0.333333	1
0.75208	ab	1.1	0	0.666667	0.333333	1
0.749628	ab	0.9	0	0.666667	0.333333	1
0.735938	abc	0.8	0	0.666667	0.333333	1
0.732893	bc	1.2	0	0.666667	0.333333	1
0.717227	cd	0.7	0	0.666667	0.333333	1
0.701185	d	1.3	0	0.666667	0.333333	1
0.697112	d	0.6	0	0.666667	0.333333	1
0.673995	e	0.5	0	0.666667	0.333333	1
0.664515	ef	1.4	0	0.666667	0.333333	1
0.648709	fg	0.4	0	0.666667	0.333333	1
0.627842	gh	1.5	0	0.666667	0.333333	1
0.620614	h	0.3	0	0.666667	0.333333	1
0.593312	i	1.6	0	0.666667	0.333333	1
0.588613	i	0.2	0	0.666667	0.333333	1
0.561283	j	1.7	0	0.666667	0.333333	1
0.548693	jk	0.1	0	0.666667	0.333333	1
0.531224	k	1.8	0	0.666667	0.333333	1
0.504051	l	1.9	0	0.666667	0.333333	1
0.452021	a	1.2	0	5.33333	2.66667	8
0.450849	a	1.1	0	5.33333	2.66667	8
0.449932	a	1.3	0	5.33333	2.66667	8
0.448065	a	1	0	5.33333	2.66667	8
0.444961	ab	1.4	0	5.33333	2.66667	8
0.443897	ab	0.9	0	5.33333	2.66667	8
0.438634	b	0.8	0	5.33333	2.66667	8
0.436803	bc	1.5	0	5.33333	2.66667	8
0.429662	cd	0.7	0	5.33333	2.66667	8
0.425997	de	1.6	0	5.33333	2.66667	8
0.420482	ef	0.6	0	5.33333	2.66667	8
0.412953	fg	1.7	0	5.33333	2.66667	8
0.410359	g	0.5	0	5.33333	2.66667	8
0.399303	h	0.4	0	5.33333	2.66667	8
0.399101	h	1.8	0	5.33333	2.66667	8
0.386896	i	0.3	0	5.33333	2.66667	8
0.38478	i	1.9	0	5.33333	2.66667	8
0.372339	j	0.2	0	5.33333	2.66667	8
0.355387	k	0.1	0	5.33333	2.66667	8

## Sheet: TH_XYY_ComparingEqualWTexperime
mean	group	Mean1	VarA	Var2	Var1	SumVar
0.624494	a	0.1	0.5	0.5	0	1
0.574982	b	0.1	0.416667	0.416667	0.166667	1
0.550609	c	0.1	0.333333	0.333333	0.333333	1
0.548693	c	0.1	0	0.666667	0.333333	1
0.542476	cd	0.1	0.166667	0.416667	0.416667	1
0.536766	d	0.1	0	0.5	0.5	1
0.55786	a	0.1	1.5	1.5	0	3
0.473049	b	0.1	1.25	1.25	0.5	3
0.452865	c	0.1	1	1	1	3
0.448517	c	0.1	0	2	1	3
0.445167	c	0.1	0.5	1.25	1.25	3
0.441215	c	0.1	0	1.5	1.5	3
0.485244	a	0.1	4	4	0	8
0.378783	b	0.1	3.33333	3.33333	1.33333	8
0.363009	c	0.1	2.66667	2.66667	2.66667	8
0.355387	c	0.1	0	5.33333	2.66667	8
0.352983	c	0.1	1.33333	3.33333	3.33333	8
0.352917	c	0.1	0	4	4	8
0.641636	a	0.2	0.5	0.5	0	1
0.614416	b	0.2	0.416667	0.416667	0.166667	1
0.590646	c	0.2	0.333333	0.333333	0.333333	1
0.588613	c	0.2	0	0.666667	0.333333	1
0.58227	d	0.2	0.166667	0.416667	0.416667	1
0.575489	e	0.2	0	0.5	0.5	1
0.571641	a	0.2	1.5	1.5	0	3
0.504089	b	0.2	1.25	1.25	0.5	3
0.480412	c	0.2	1	1	1	3
0.475668	cd	0.2	0	2	1	3
0.471399	cd	0.2	0.5	1.25	1.25	3
0.467517	d	0.2	0	1.5	1.5	3
0.495962	a	0.2	4	4	0	8
0.398249	b	0.2	3.33333	3.33333	1.33333	8
0.379143	c	0.2	2.66667	2.66667	2.66667	8
0.372339	c	0.2	0	5.33333	2.66667	8
0.369022	c	0.2	1.33333	3.33333	3.33333	8
0.367712	c	0.2	0	4	4	8
0.660105	a	0.3	0.5	0.5	0	1
0.643071	b	0.3	0.416667	0.416667	0.166667	1
0.6225	c	0.3	0.333333	0.333333	0.333333	1
0.620614	c	0.3	0	0.666667	0.333333	1
0.61409	d	0.3	0.166667	0.416667	0.416667	1
0.607645	e	0.3	0	0.5	0.5	1
0.584966	a	0.3	1.5	1.5	0	3
0.527365	b	0.3	1.25	1.25	0.5	3
0.502741	c	0.3	1	1	1	3
0.499366	cd	0.3	0	2	1	3
0.492817	de	0.3	0.5	1.25	1.25	3
0.489094	e	0.3	0	1.5	1.5	3
0.507107	a	0.3	4	4	0	8
0.415431	b	0.3	3.33333	3.33333	1.33333	8
0.393271	c	0.3	2.66667	2.66667	2.66667	8
0.386896	c	0.3	0	5.33333	2.66667	8
0.383087	c	0.3	1.33333	3.33333	3.33333	8
0.381452	c	0.3	0	4	4	8
0.679558	a	0.4	0.5	0.5	0	1
0.66751	b	0.4	0.416667	0.416667	0.166667	1
0.650577	c	0.4	0.333333	0.333333	0.333333	1
0.648709	c	0.4	0	0.666667	0.333333	1
0.642007	d	0.4	0.166667	0.416667	0.416667	1
0.636408	e	0.4	0	0.5	0.5	1
0.599863	a	0.4	1.5	1.5	0	3
0.548948	b	0.4	1.25	1.25	0.5	3
0.523763	c	0.4	1	1	1	3
0.518992	cd	0.4	0	2	1	3
0.513308	de	0.4	0.5	1.25	1.25	3
0.507973	e	0.4	0	1.5	1.5	3
0.518061	a	0.4	4	4	0	8
0.429496	b	0.4	3.33333	3.33333	1.33333	8
0.406803	c	0.4	2.66667	2.66667	2.66667	8
0.399303	cd	0.4	0	5.33333	2.66667	8
0.395144	cd	0.4	1.33333	3.33333	3.33333	8
0.393368	d	0.4	0	4	4	8
0.699602	a	0.5	0.5	0.5	0	1
0.689863	b	0.5	0.416667	0.416667	0.166667	1
0.675706	c	0.5	0.333333	0.333333	0.333333	1
0.673995	c	0.5	0	0.666667	0.333333	1
0.667666	d	0.5	0.166667	0.416667	0.416667	1
0.663173	e	0.5	0	0.5	0.5	1
0.6137	a	0.5	1.5	1.5	0	3
0.567032	b	0.5	1.25	1.25	0.5	3
0.541947	c	0.5	1	1	1	3
0.537142	cd	0.5	0	2	1	3
0.531083	de	0.5	0.5	1.25	1.25	3
0.526158	e	0.5	0	1.5	1.5	3
0.526234	a	0.5	4	4	0	8
0.441004	b	0.5	3.33333	3.33333	1.33333	8
0.417586	c	0.5	2.66667	2.66667	2.66667	8
0.410359	cd	0.5	0	5.33333	2.66667	8
0.405613	cd	0.5	1.33333	3.33333	3.33333	8
0.403041	d	0.5	0	4	4	8
0.720107	a	0.6	0.5	0.5	0	1
0.710853	b	0.6	0.416667	0.416667	0.166667	1
0.69782	c	0.6	0.333333	0.333333	0.333333	1
0.697112	c	0.6	0	0.666667	0.333333	1
0.690875	d	0.6	0.166667	0.416667	0.416667	1
0.686479	e	0.6	0	0.5	0.5	1
0.627737	a	0.6	1.5	1.5	0	3
0.58178	b	0.6	1.25	1.25	0.5	3
0.557387	c	0.6	1	1	1	3
0.553219	cd	0.6	0	2	1	3
0.54617	de	0.6	0.5	1.25	1.25	3
0.541966	e	0.6	0	1.5	1.5	3
0.533652	a	0.6	4	4	0	8
0.451993	b	0.6	3.33333	3.33333	1.33333	8
0.427959	c	0.6	2.66667	2.66667	2.66667	8
0.420482	cd	0.6	0	5.33333	2.66667	8
0.413395	d	0.6	1.33333	3.33333	3.33333	8
0.413278	d	0.6	0	4	4	8
0.740567	a	0.7	0.5	0.5	0	1
0.730436	b	0.7	0.416667	0.416667	0.166667	1
0.718127	c	0.7	0.333333	0.333333	0.333333	1
0.717227	c	0.7	0	0.666667	0.333333	1
0.711581	d	0.7	0.166667	0.416667	0.416667	1
0.708202	e	0.7	0	0.5	0.5	1
0.637926	a	0.7	1.5	1.5	0	3
0.59456	b	0.7	1.25	1.25	0.5	3
0.571447	c	0.7	1	1	1	3
0.566895	cd	0.7	0	2	1	3
0.559748	de	0.7	0.5	1.25	1.25	3
0.556839	e	0.7	0	1.5	1.5	3
0.53812	a	0.7	4	4	0	8
0.46034	b	0.7	3.33333	3.33333	1.33333	8
0.436385	c	0.7	2.66667	2.66667	2.66667	8
0.429662	cd	0.7	0	5.33333	2.66667	8
0.421617	d	0.7	1.33333	3.33333	3.33333	8
0.421097	d	0.7	0	4	4	8
0.759363	a	0.8	0.5	0.5	0	1
0.74663	b	0.8	0.416667	0.416667	0.166667	1
0.735938	c	0.8	0	0.666667	0.333333	1
0.735026	c	0.8	0.333333	0.333333	0.333333	1
0.728939	d	0.8	0.166667	0.416667	0.416667	1
0.726901	d	0.8	0	0.5	0.5	1
0.645888	a	0.8	1.5	1.5	0	3
0.603448	b	0.8	1.25	1.25	0.5	3
0.582178	c	0.8	1	1	1	3
0.57866	c	0.8	0	2	1	3
0.570352	d	0.8	0.5	1.25	1.25	3
0.568979	d	0.8	0	1.5	1.5	3
0.537612	a	0.8	4	4	0	8
0.466942	b	0.8	3.33333	3.33333	1.33333	8
0.444005	c	0.8	2.66667	2.66667	2.66667	8
0.438634	cd	0.8	0	5.33333	2.66667	8
0.430086	d	0.8	1.33333	3.33333	3.33333	8
0.429576	d	0.8	0	4	4	8
0.772678	a	0.9	0.5	0.5	0	1
0.758196	b	0.9	0.416667	0.416667	0.166667	1
0.749628	c	0.9	0	0.666667	0.333333	1
0.747096	c	0.9	0.333333	0.333333	0.333333	1
0.742231	d	0.9	0.166667	0.416667	0.416667	1
0.741779	d	0.9	0	0.5	0.5	1
0.646384	a	0.9	1.5	1.5	0	3
0.609055	b	0.9	1.25	1.25	0.5	3
0.5894	c	0.9	1	1	1	3
0.589016	c	0.9	0	2	1	3
0.57868	d	0.9	0	1.5	1.5	3
0.578237	d	0.9	0.5	1.25	1.25	3
0.533964	a	0.9	4	4	0	8
0.471569	b	0.9	3.33333	3.33333	1.33333	8
0.449415	c	0.9	2.66667	2.66667	2.66667	8
0.443897	cd	0.9	0	5.33333	2.66667	8
0.435689	d	0.9	0	4	4	8
0.435071	d	0.9	1.33333	3.33333	3.33333	8
0.774281	a	1	0.5	0.5	0	1
0.760485	b	1	0.416667	0.416667	0.166667	1
0.756612	c	1	0	0.666667	0.333333	1
0.75159	d	1	0.333333	0.333333	0.333333	1
0.749484	de	1	0	0.5	0.5	1
0.747937	e	1	0.166667	0.416667	0.416667	1
0.641293	a	1	1.5	1.5	0	3
0.609459	b	1	1.25	1.25	0.5	3
0.593407	c	1	1	1	1	3
0.5933	c	1	0	2	1	3
0.585336	d	1	0	1.5	1.5	3
0.582697	d	1	0.5	1.25	1.25	3
0.527927	a	1	4	4	0	8
0.47276	b	1	3.33333	3.33333	1.33333	8
0.453052	c	1	2.66667	2.66667	2.66667	8
0.448065	cd	1	0	5.33333	2.66667	8
0.440685	de	1	0	4	4	8
0.438501	e	1	1.33333	3.33333	3.33333	8
0.761729	a	1.1	0.5	0.5	0	1
0.75208	b	1.1	0	0.666667	0.333333	1
0.751715	b	1.1	0.416667	0.416667	0.166667	1
0.749027	c	1.1	0	0.5	0.5	1
0.746202	d	1.1	0.333333	0.333333	0.333333	1
0.74429	d	1.1	0.166667	0.416667	0.416667	1
0.630649	a	1.1	1.5	1.5	0	3
0.604298	b	1.1	1.25	1.25	0.5	3
0.595131	c	1.1	0	2	1	3
0.59297	c	1.1	1	1	1	3
0.588262	d	1.1	0	1.5	1.5	3
0.583168	e	1.1	0.5	1.25	1.25	3
0.518559	a	1.1	4	4	0	8
0.471731	b	1.1	3.33333	3.33333	1.33333	8
0.454244	c	1.1	2.66667	2.66667	2.66667	8
0.450849	c	1.1	0	5.33333	2.66667	8
0.443006	d	1.1	0	4	4	8
0.439753	d	1.1	1.33333	3.33333	3.33333	8
0.735745	a	1.2	0.5	0.5	0	1
0.734058	b	1.2	0	0.5	0.5	1
0.732893	b	1.2	0	0.666667	0.333333	1
0.73143	c	1.2	0.416667	0.416667	0.166667	1
0.730265	c	1.2	0.166667	0.416667	0.416667	1
0.730043	c	1.2	0.333333	0.333333	0.333333	1
0.612693	a	1.2	1.5	1.5	0	3
0.59528	b	1.2	1.25	1.25	0.5	3
0.59056	c	1.2	0	2	1	3
0.587697	cd	1.2	1	1	1	3
0.585613	d	1.2	0	1.5	1.5	3
0.579566	e	1.2	0.5	1.25	1.25	3
0.505486	a	1.2	4	4	0	8
0.467388	b	1.2	3.33333	3.33333	1.33333	8
0.453124	c	1.2	2.66667	2.66667	2.66667	8
0.452021	c	1.2	0	5.33333	2.66667	8
0.445262	d	1.2	0	4	4	8
0.439471	d	1.2	1.33333	3.33333	3.33333	8
0.70793	a	1.3	0	0.5	0.5	1
0.705517	b	1.3	0.166667	0.416667	0.416667	1
0.704684	b	1.3	0.333333	0.333333	0.333333	1
0.702763	c	1.3	0.5	0.5	0	1
0.702744	c	1.3	0.416667	0.416667	0.166667	1
0.701185	d	1.3	0	0.666667	0.333333	1
0.592528	a	1.3	1.5	1.5	0	3
0.581409	b	1.3	1.25	1.25	0.5	3
0.578132	c	1.3	0	2	1	3
0.577915	c	1.3	1	1	1	3
0.577648	c	1.3	0	1.5	1.5	3
0.570973	d	1.3	0.5	1.25	1.25	3
0.491552	a	1.3	4	4	0	8
0.462636	b	1.3	3.33333	3.33333	1.33333	8
0.451038	c	1.3	2.66667	2.66667	2.66667	8
0.449932	cd	1.3	0	5.33333	2.66667	8
0.444754	d	1.3	0	4	4	8
0.437072	e	1.3	1.33333	3.33333	3.33333	8
0.674269	a	1.4	0.166667	0.416667	0.416667	1
0.673579	a	1.4	0	0.5	0.5	1
0.673342	a	1.4	0.333333	0.333333	0.333333	1
0.66941	b	1.4	0.416667	0.416667	0.166667	1
0.667339	c	1.4	0.5	0.5	0	1
0.664515	d	1.4	0	0.666667	0.333333	1
0.570017	a	1.4	1.5	1.5	0	3
0.565792	b	1.4	0	1.5	1.5	3
0.564059	bc	1.4	1.25	1.25	0.5	3
0.563608	bc	1.4	1	1	1	3
0.562055	c	1.4	0	2	1	3
0.557763	d	1.4	0.5	1.25	1.25	3
0.476574	a	1.4	4	4	0	8
0.454198	b	1.4	3.33333	3.33333	1.33333	8
0.445293	c	1.4	2.66667	2.66667	2.66667	8
0.444961	c	1.4	0	5.33333	2.66667	8
0.441325	c	1.4	0	4	4	8
0.432627	d	1.4	1.33333	3.33333	3.33333	8
0.639892	a	1.5	0.166667	0.416667	0.416667	1
0.63979	a	1.5	0.333333	0.333333	0.333333	1
0.637091	b	1.5	0	0.5	0.5	1
0.634964	c	1.5	0.416667	0.416667	0.166667	1
0.631097	d	1.5	0.5	0.5	0	1
0.627842	e	1.5	0	0.666667	0.333333	1
0.548237	a	1.5	0	1.5	1.5	3
0.547745	ab	1.5	1	1	1	3
0.546127	bc	1.5	1.5	1.5	0	3
0.544866	c	1.5	1.25	1.25	0.5	3
0.542358	d	1.5	0.5	1.25	1.25	3
0.540749	d	1.5	0	2	1	3
0.460933	a	1.5	4	4	0	8
0.444132	b	1.5	3.33333	3.33333	1.33333	8
0.438361	c	1.5	2.66667	2.66667	2.66667	8
0.436803	c	1.5	0	5.33333	2.66667	8
0.435668	c	1.5	0	4	4	8
0.426253	d	1.5	1.33333	3.33333	3.33333	8
0.606165	a	1.6	0.333333	0.333333	0.333333	1
0.606011	a	1.6	0.166667	0.416667	0.416667	1
0.60217	b	1.6	0	0.5	0.5	1
0.601497	b	1.6	0.416667	0.416667	0.166667	1
0.59724	c	1.6	0.5	0.5	0	1
0.593312	d	1.6	0	0.666667	0.333333	1
0.528226	a	1.6	1	1	1	3
0.527599	a	1.6	0	1.5	1.5	3
0.524358	b	1.6	1.25	1.25	0.5	3
0.523521	b	1.6	0.5	1.25	1.25	3
0.523075	b	1.6	1.5	1.5	0	3
0.517781	c	1.6	0	2	1	3
0.444653	a	1.6	4	4	0	8
0.433269	b	1.6	3.33333	3.33333	1.33333	8
0.429797	c	1.6	2.66667	2.66667	2.66667	8
0.427511	cd	1.6	0	4	4	8
0.425997	d	1.6	0	5.33333	2.66667	8
0.418486	e	1.6	1.33333	3.33333	3.33333	8
0.574337	a	1.7	0.333333	0.333333	0.333333	1
0.573494	a	1.7	0.166667	0.416667	0.416667	1
0.569563	b	1.7	0.416667	0.416667	0.166667	1
0.569141	b	1.7	0	0.5	0.5	1
0.565199	c	1.7	0.5	0.5	0	1
0.561283	d	1.7	0	0.666667	0.333333	1
0.50828	a	1.7	1	1	1	3
0.505142	b	1.7	0	1.5	1.5	3
0.503739	bc	1.7	0.5	1.25	1.25	3
0.503035	c	1.7	1.25	1.25	0.5	3
0.50013	d	1.7	1.5	1.5	0	3
0.493882	e	1.7	0	2	1	3
0.428354	a	1.7	4	4	0	8
0.420484	b	1.7	3.33333	3.33333	1.33333	8
0.419094	bc	1.7	2.66667	2.66667	2.66667	8
0.416531	c	1.7	0	4	4	8
0.412953	d	1.7	0	5.33333	2.66667	8
0.408723	e	1.7	1.33333	3.33333	3.33333	8
0.544467	a	1.8	0.333333	0.333333	0.333333	1
0.54324	b	1.8	0.166667	0.416667	0.416667	1
0.540022	c	1.8	0.416667	0.416667	0.166667	1
0.539191	c	1.8	0	0.5	0.5	1
0.535859	d	1.8	0.5	0.5	0	1
0.531224	e	1.8	0	0.666667	0.333333	1
0.487407	a	1.8	1	1	1	3
0.483168	b	1.8	0.5	1.25	1.25	3
0.4824	b	1.8	0	1.5	1.5	3
0.481278	b	1.8	1.25	1.25	0.5	3
0.477538	c	1.8	1.5	1.5	0	3
0.471698	d	1.8	0	2	1	3
0.412768	a	1.8	4	4	0	8
0.408296	b	1.8	2.66667	2.66667	2.66667	8
0.408103	b	1.8	3.33333	3.33333	1.33333	8
0.405179	b	1.8	0	4	4	8
0.399101	c	1.8	0	5.33333	2.66667	8
0.397633	c	1.8	1.33333	3.33333	3.33333	8
0.516803	a	1.9	0.333333	0.333333	0.333333	1
0.515433	b	1.9	0.166667	0.416667	0.416667	1
0.512423	c	1.9	0.416667	0.416667	0.166667	1
0.511219	d	1.9	0	0.5	0.5	1
0.508722	e	1.9	0.5	0.5	0	1
0.504051	f	1.9	0	0.666667	0.333333	1
0.46769	a	1.9	1	1	1	3
0.46254	b	1.9	0.5	1.25	1.25	3
0.461063	bc	1.9	1.25	1.25	0.5	3
0.460445	c	1.9	0	1.5	1.5	3
0.456466	d	1.9	1.5	1.5	0	3
0.449282	e	1.9	0	2	1	3
0.397098	a	1.9	4	4	0	8
0.396243	a	1.9	2.66667	2.66667	2.66667	8
0.394424	ab	1.9	3.33333	3.33333	1.33333	8
0.391917	b	1.9	0	4	4	8
0.386811	c	1.9	1.33333	3.33333	3.33333	8
0.38478	c	1.9	0	5.33333	2.66667	8

## Sheet: IDSCV_XYY_ComparingEqualVTexper
mean	group	Mean1	SCVA	SCV2	SCV1	SumSCV
0.98668	a	0.1	1	1	1	3
0.964646	b	0.2	1	1	1	3
0.956854	b	1.9	1	1	1	3
0.950698	bc	0.3	1	1	1	3
0.938171	cd	1.8	1	1	1	3
0.929948	de	0.4	1	1	1	3
0.91576	ef	1.7	1	1	1	3
0.910432	fg	0.5	1	1	1	3
0.894424	gh	1.6	1	1	1	3
0.88983	h	0.6	1	1	1	3
0.885884	h	1.5	1	1	1	3
0.863075	i	0.7	1	1	1	3
0.861261	i	1.4	1	1	1	3
0.853192	ij	0.8	1	1	1	3
0.847352	ij	1.3	1	1	1	3
0.846117	ij	0.9	1	1	1	3
0.844886	ij	1.2	1	1	1	3
0.838613	j	1	1	1	1	3
0.837347	j	1.1	1	1	1	3
1.11395	a	1.9	0.5	1.25	1.25	3
1.08164	b	1.8	0.5	1.25	1.25	3
1.04273	c	1.7	0.5	1.25	1.25	3
1.00787	d	1.6	0.5	1.25	1.25	3
0.961083	e	1.5	0.5	1.25	1.25	3
0.925262	f	1.4	0.5	1.25	1.25	3
0.884626	g	1.3	0.5	1.25	1.25	3
0.855071	h	1.2	0.5	1.25	1.25	3
0.826387	i	1.1	0.5	1.25	1.25	3
0.803646	ij	1	0.5	1.25	1.25	3
0.800214	j	0.1	0.5	1.25	1.25	3
0.7883	jk	0.2	0.5	1.25	1.25	3
0.786964	jk	0.9	0.5	1.25	1.25	3
0.77397	kl	0.3	0.5	1.25	1.25	3
0.770105	kl	0.8	0.5	1.25	1.25	3
0.76925	kl	0.4	0.5	1.25	1.25	3
0.764051	kl	0.5	0.5	1.25	1.25	3
0.757615	l	0.6	0.5	1.25	1.25	3
0.754785	l	0.7	0.5	1.25	1.25	3
1.19914	a	0.1	1.25	1.25	0.5	3
1.18763	a	0.2	1.25	1.25	0.5	3
1.16801	b	0.3	1.25	1.25	0.5	3
1.14739	c	0.4	1.25	1.25	0.5	3
1.12953	d	0.5	1.25	1.25	0.5	3
1.09476	e	0.6	1.25	1.25	0.5	3
1.0526	f	0.7	1.25	1.25	0.5	3
1.01107	g	0.8	1.25	1.25	0.5	3
0.964308	h	0.9	1.25	1.25	0.5	3
0.903282	i	1	1.25	1.25	0.5	3
0.868247	j	1.1	1.25	1.25	0.5	3
0.81505	k	1.2	1.25	1.25	0.5	3
0.769872	l	1.3	1.25	1.25	0.5	3
0.727339	m	1.4	1.25	1.25	0.5	3
0.691318	n	1.5	1.25	1.25	0.5	3
0.658171	o	1.6	1.25	1.25	0.5	3
0.630252	p	1.7	1.25	1.25	0.5	3
0.608002	q	1.8	1.25	1.25	0.5	3
0.58813	r	1.9	1.25	1.25	0.5	3
1.30567	a	1.9	0	1.5	1.5	3
1.23622	b	1.8	0	1.5	1.5	3
1.19916	c	1.7	0	1.5	1.5	3
1.13541	d	1.6	0	1.5	1.5	3
1.08446	e	1.5	0	1.5	1.5	3
1.03142	f	1.4	0	1.5	1.5	3
0.967481	g	1.3	0	1.5	1.5	3
0.91499	h	1.2	0	1.5	1.5	3
0.853395	i	1.1	0	1.5	1.5	3
0.799811	j	1	0	1.5	1.5	3
0.748154	k	0.9	0	1.5	1.5	3
0.725641	k	0.8	0	1.5	1.5	3
0.6799	l	0.7	0	1.5	1.5	3
0.65876	lm	0.6	0	1.5	1.5	3
0.637862	mn	0.5	0	1.5	1.5	3
0.636144	mn	0.4	0	1.5	1.5	3
0.616214	n	0.1	0	1.5	1.5	3
0.610571	n	0.2	0	1.5	1.5	3
0.607306	n	0.3	0	1.5	1.5	3
1.41889	a	0.1	1.5	1.5	0	3
1.40015	ab	0.3	1.5	1.5	0	3
1.38922	ab	0.2	1.5	1.5	0	3
1.38347	abc	0.5	1.5	1.5	0	3
1.36614	bc	0.4	1.5	1.5	0	3
1.34555	cd	0.6	1.5	1.5	0	3
1.32056	d	0.7	1.5	1.5	0	3
1.27438	e	0.8	1.5	1.5	0	3
1.20404	f	0.9	1.5	1.5	0	3
1.13738	g	1	1.5	1.5	0	3
1.0406	h	1.1	1.5	1.5	0	3
0.935298	i	1.2	1.5	1.5	0	3
0.819505	j	1.3	1.5	1.5	0	3
0.704857	k	1.4	1.5	1.5	0	3
0.594821	l	1.5	1.5	1.5	0	3
0.497651	m	1.6	1.5	1.5	0	3
0.403041	n	1.7	1.5	1.5	0	3
0.320385	o	1.8	1.5	1.5	0	3
0.251917	p	1.9	1.5	1.5	0	3
0.383487	a	1.5	0.333333	0.333333	0.333333	1
0.383161	a	1.6	0.333333	0.333333	0.333333	1
0.382941	a	1.7	0.333333	0.333333	0.333333	1
0.379202	b	1.4	0.333333	0.333333	0.333333	1
0.374416	c	1.8	0.333333	0.333333	0.333333	1
0.374115	c	1.3	0.333333	0.333333	0.333333	1
0.369323	d	1.9	0.333333	0.333333	0.333333	1
0.366059	de	0.1	0.333333	0.333333	0.333333	1
0.365557	e	1.2	0.333333	0.333333	0.333333	1
0.36314	ef	0.4	0.333333	0.333333	0.333333	1
0.363046	ef	0.2	0.333333	0.333333	0.333333	1
0.363022	ef	0.3	0.333333	0.333333	0.333333	1
0.359658	fg	0.5	0.333333	0.333333	0.333333	1
0.357865	gh	1.1	0.333333	0.333333	0.333333	1
0.355723	hi	0.6	0.333333	0.333333	0.333333	1
0.353034	ij	1	0.333333	0.333333	0.333333	1
0.35297	ij	0.7	0.333333	0.333333	0.333333	1
0.350111	j	0.8	0.333333	0.333333	0.333333	1
0.349803	j	0.9	0.333333	0.333333	0.333333	1
0.428763	a	1.9	0.166667	0.416667	0.416667	1
0.425064	a	1.8	0.166667	0.416667	0.416667	1
0.422096	a	1.7	0.166667	0.416667	0.416667	1
0.4157	b	1.6	0.166667	0.416667	0.416667	1
0.402317	c	1.5	0.166667	0.416667	0.416667	1
0.381925	d	1.4	0.166667	0.416667	0.416667	1
0.361098	e	1.3	0.166667	0.416667	0.416667	1
0.339004	f	1.2	0.166667	0.416667	0.416667	1
0.315309	g	1.1	0.166667	0.416667	0.416667	1
0.293787	h	1	0.166667	0.416667	0.416667	1
0.278849	i	0.9	0.166667	0.416667	0.416667	1
0.267671	j	0.8	0.166667	0.416667	0.416667	1
0.260149	k	0.7	0.166667	0.416667	0.416667	1
0.259297	k	0.6	0.166667	0.416667	0.416667	1
0.257106	k	0.5	0.166667	0.416667	0.416667	1
0.255924	k	0.3	0.166667	0.416667	0.416667	1
0.255555	k	0.2	0.166667	0.416667	0.416667	1
0.255179	k	0.4	0.166667	0.416667	0.416667	1
0.253732	k	0.1	0.166667	0.416667	0.416667	1
0.450077	a	0.2	0.416667	0.416667	0.166667	1
0.449677	a	0.1	0.416667	0.416667	0.166667	1
0.448857	a	0.3	0.416667	0.416667	0.166667	1
0.447198	a	0.4	0.416667	0.416667	0.166667	1
0.443886	a	0.5	0.416667	0.416667	0.166667	1
0.437539	b	0.6	0.416667	0.416667	0.166667	1
0.430709	c	0.7	0.416667	0.416667	0.166667	1
0.42083	d	0.8	0.416667	0.416667	0.166667	1
0.408451	e	0.9	0.416667	0.416667	0.166667	1
0.391895	f	1	0.416667	0.416667	0.166667	1
0.373634	g	1.1	0.416667	0.416667	0.166667	1
0.354771	h	1.2	0.416667	0.416667	0.166667	1
0.335234	i	1.3	0.416667	0.416667	0.166667	1
0.313942	j	1.4	0.416667	0.416667	0.166667	1
0.293728	k	1.5	0.416667	0.416667	0.166667	1
0.274139	l	1.6	0.416667	0.416667	0.166667	1
0.256957	m	1.7	0.416667	0.416667	0.166667	1
0.239633	n	1.8	0.416667	0.416667	0.166667	1
0.225263	o	1.9	0.416667	0.416667	0.166667	1
0.485024	a	1.9	0	0.5	0.5	1
0.473896	b	1.8	0	0.5	0.5	1
0.46039	c	1.7	0	0.5	0.5	1
0.442592	d	1.6	0	0.5	0.5	1
0.418846	e	1.5	0	0.5	0.5	1
0.390368	f	1.4	0	0.5	0.5	1
0.355776	g	1.3	0	0.5	0.5	1
0.316956	h	1.2	0	0.5	0.5	1
0.276668	i	1.1	0	0.5	0.5	1
0.240514	j	1	0	0.5	0.5	1
0.210677	k	0.9	0	0.5	0.5	1
0.188665	l	0.8	0	0.5	0.5	1
0.170712	m	0.7	0	0.5	0.5	1
0.159404	n	0.6	0	0.5	0.5	1
0.152155	no	0.5	0	0.5	0.5	1
0.147488	op	0.4	0	0.5	0.5	1
0.139132	pq	0.3	0	0.5	0.5	1
0.136002	q	0.2	0	0.5	0.5	1
0.134491	q	0.1	0	0.5	0.5	1
0.532962	a	0.1	0.5	0.5	0	1
0.528807	a	0.2	0.5	0.5	0	1
0.526821	ab	0.3	0.5	0.5	0	1
0.526471	ab	0.5	0.5	0.5	0	1
0.525976	ab	0.4	0.5	0.5	0	1
0.522788	ab	0.6	0.5	0.5	0	1
0.517272	ab	0.7	0.5	0.5	0	1
0.50932	b	0.8	0.5	0.5	0	1
0.490487	c	0.9	0.5	0.5	0	1
0.463419	d	1	0.5	0.5	0	1
0.422964	e	1.1	0.5	0.5	0	1
0.372717	f	1.2	0.5	0.5	0	1
0.317943	g	1.3	0.5	0.5	0	1
0.264522	h	1.4	0.5	0.5	0	1
0.215109	i	1.5	0.5	0.5	0	1
0.171947	j	1.6	0.5	0.5	0	1
0.136413	k	1.7	0.5	0.5	0	1
0.106143	l	1.8	0.5	0.5	0	1
0.0809345	m	1.9	0.5	0.5	0	1
2.27256	a	0.1	2.66667	2.66667	2.66667	8
2.17914	b	0.2	2.66667	2.66667	2.66667	8
2.10565	bc	1.9	2.66667	2.66667	2.66667	8
2.07145	cd	0.3	2.66667	2.66667	2.66667	8
2.01223	de	1.8	2.66667	2.66667	2.66667	8
1.96813	ef	0.4	2.66667	2.66667	2.66667	8
1.93131	efg	1.7	2.66667	2.66667	2.66667	8
1.91362	fgh	0.5	2.66667	2.66667	2.66667	8
1.89922	fghi	1.6	2.66667	2.66667	2.66667	8
1.88098	fghi	1.5	2.66667	2.66667	2.66667	8
1.86746	ghij	0.6	2.66667	2.66667	2.66667	8
1.82622	hij	0.7	2.66667	2.66667	2.66667	8
1.82104	ij	1.4	2.66667	2.66667	2.66667	8
1.81458	ij	1.3	2.66667	2.66667	2.66667	8
1.78727	j	0.8	2.66667	2.66667	2.66667	8
1.78319	j	1.2	2.66667	2.66667	2.66667	8
1.77957	j	0.9	2.66667	2.66667	2.66667	8
1.77884	j	1	2.66667	2.66667	2.66667	8
1.77702	j	1.1	2.66667	2.66667	2.66667	8
2.45097	a	1.8	1.33333	3.33333	3.33333	8
2.44044	a	1.9	1.33333	3.33333	3.33333	8
2.28031	b	1.7	1.33333	3.33333	3.33333	8
2.22714	bc	1.6	1.33333	3.33333	3.33333	8
2.11269	cd	1.5	1.33333	3.33333	3.33333	8
2.05514	de	1.4	1.33333	3.33333	3.33333	8
2.05478	de	0.1	1.33333	3.33333	3.33333	8
1.99292	def	1.3	1.33333	3.33333	3.33333	8
1.9788	def	0.2	1.33333	3.33333	3.33333	8
1.93553	efg	0.3	1.33333	3.33333	3.33333	8
1.93274	efg	1.2	1.33333	3.33333	3.33333	8
1.88451	fgh	1.1	1.33333	3.33333	3.33333	8
1.82862	gh	0.9	1.33333	3.33333	3.33333	8
1.82684	gh	1	1.33333	3.33333	3.33333	8
1.81816	gh	0.5	1.33333	3.33333	3.33333	8
1.81642	gh	0.4	1.33333	3.33333	3.33333	8
1.80472	gh	0.7	1.33333	3.33333	3.33333	8
1.78545	gh	0.6	1.33333	3.33333	3.33333	8
1.77448	h	0.8	1.33333	3.33333	3.33333	8
2.82525	a	0.1	3.33333	3.33333	1.33333	8
2.70413	b	0.2	3.33333	3.33333	1.33333	8
2.6327	b	0.3	3.33333	3.33333	1.33333	8
2.61446	b	0.4	3.33333	3.33333	1.33333	8
2.34496	c	0.5	3.33333	3.33333	1.33333	8
2.31328	c	0.6	3.33333	3.33333	1.33333	8
2.18055	d	0.7	3.33333	3.33333	1.33333	8
2.10769	d	0.8	3.33333	3.33333	1.33333	8
1.97386	e	0.9	3.33333	3.33333	1.33333	8
1.89056	ef	1	3.33333	3.33333	1.33333	8
1.80231	fg	1.1	3.33333	3.33333	1.33333	8
1.71041	gh	1.2	3.33333	3.33333	1.33333	8
1.64176	hi	1.3	3.33333	3.33333	1.33333	8
1.55121	ij	1.4	3.33333	3.33333	1.33333	8
1.49704	jk	1.5	3.33333	3.33333	1.33333	8
1.4388	kl	1.6	3.33333	3.33333	1.33333	8
1.39406	lm	1.7	3.33333	3.33333	1.33333	8
1.36301	lm	1.8	3.33333	3.33333	1.33333	8
1.33032	m	1.9	3.33333	3.33333	1.33333	8
2.93394	a	1.9	0	4	4	8
2.89884	a	1.8	0	4	4	8
2.71585	b	1.7	0	4	4	8
2.64201	b	1.6	0	4	4	8
2.54448	b	1.5	0	4	4	8
2.29178	c	1.4	0	4	4	8
2.29081	c	1.3	0	4	4	8
2.19437	cd	1.2	0	4	4	8
2.11261	cde	1.1	0	4	4	8
2.02727	def	1	0	4	4	8
1.99348	efg	0.9	0	4	4	8
1.91835	fgh	0.8	0	4	4	8
1.90419	fgh	0.5	0	4	4	8
1.88189	fgh	0.2	0	4	4	8
1.85882	fgh	0.7	0	4	4	8
1.82926	gh	0.3	0	4	4	8
1.82453	gh	0.1	0	4	4	8
1.78608	h	0.6	0	4	4	8
1.75173	h	0.4	0	4	4	8
3.29784	a	0.1	4	4	0	8
3.27359	a	0.3	4	4	0	8
3.24862	ab	0.2	4	4	0	8
3.21897	ab	0.4	4	4	0	8
3.19901	ab	0.5	4	4	0	8
3.09818	bc	0.6	4	4	0	8
2.98189	cd	0.7	4	4	0	8
2.86232	d	0.8	4	4	0	8
2.69277	e	0.9	4	4	0	8
2.44288	f	1	4	4	0	8
2.32132	f	1.1	4	4	0	8
2.08785	g	1.2	4	4	0	8
1.91866	h	1.3	4	4	0	8
1.7003	i	1.4	4	4	0	8
1.50582	j	1.5	4	4	0	8
1.29361	k	1.6	4	4	0	8
1.08089	l	1.7	4	4	0	8
0.928467	m	1.8	4	4	0	8
0.771212	n	1.9	4	4	0	8
0.924813	a	1.9	0	2	1	3
0.90043	ab	1.8	0	2	1	3
0.894498	abc	1.7	0	2	1	3
0.888452	bcd	0.2	0	2	1	3
0.887795	bcd	1.6	0	2	1	3
0.878681	bcde	0.3	0	2	1	3
0.874264	bcdef	1.5	0	2	1	3
0.871599	bcdef	0.4	0	2	1	3
0.867781	bcdef	0.1	0	2	1	3
0.864059	bcdef	1.4	0	2	1	3
0.856904	cdef	1.2	0	2	1	3
0.856849	cdef	1.3	0	2	1	3
0.853879	def	0.8	0	2	1	3
0.852063	def	0.9	0	2	1	3
0.850669	def	0.7	0	2	1	3
0.850205	def	0.5	0	2	1	3
0.839078	ef	1.1	0	2	1	3
0.837646	f	0.6	0	2	1	3
0.836462	f	1	0	2	1	3
0.324788	a	1.9	0	0.666667	0.333333	1
0.324714	a	1.8	0	0.666667	0.333333	1
0.320608	ab	1.7	0	0.666667	0.333333	1
0.317394	b	1.6	0	0.666667	0.333333	1
0.310671	c	1.5	0	0.666667	0.333333	1
0.30112	d	1.4	0	0.666667	0.333333	1
0.289632	e	1.3	0	0.666667	0.333333	1
0.276963	f	1.2	0	0.666667	0.333333	1
0.264502	g	1.1	0	0.666667	0.333333	1
0.252577	h	1	0	0.666667	0.333333	1
0.242619	i	0.9	0	0.666667	0.333333	1
0.233534	j	0.8	0	0.666667	0.333333	1
0.225375	k	0.7	0	0.666667	0.333333	1
0.221315	kl	0.6	0	0.666667	0.333333	1
0.218546	l	0.5	0	0.666667	0.333333	1
0.213386	m	0.4	0	0.666667	0.333333	1
0.210361	m	0.3	0	0.666667	0.333333	1
0.20192	n	0.2	0	0.666667	0.333333	1
0.200816	n	0.1	0	0.666667	0.333333	1
2.61287	a	0.1	0	5.33333	2.66667	8
2.61068	a	0.3	0	5.33333	2.66667	8
2.44583	ab	0.5	0	5.33333	2.66667	8
2.39427	abc	0.2	0	5.33333	2.66667	8
2.38064	abcd	0.4	0	5.33333	2.66667	8
2.26298	bcde	0.6	0	5.33333	2.66667	8
2.24012	bcde	0.7	0	5.33333	2.66667	8
2.16863	cde	1.9	0	5.33333	2.66667	8
2.1613	cde	1.7	0	5.33333	2.66667	8
2.16049	cde	1	0	5.33333	2.66667	8
2.16011	cde	1.8	0	5.33333	2.66667	8
2.14749	de	1.5	0	5.33333	2.66667	8
2.14048	de	0.9	0	5.33333	2.66667	8
2.13294	de	1.3	0	5.33333	2.66667	8
2.12485	e	1.4	0	5.33333	2.66667	8
2.11865	e	1.6	0	5.33333	2.66667	8
2.11489	e	1.1	0	5.33333	2.66667	8
2.11227	e	0.8	0	5.33333	2.66667	8
2.10618	e	1.2	0	5.33333	2.66667	8

## Sheet: IDSCV_XYY_ComparingEqualWTexper
mean	group	Mean1	SCVA	SCV2	SCV1	SumSCV
0.532962	a	0.1	0.5	0.5	0	1
0.449677	b	0.1	0.416667	0.416667	0.166667	1
0.366059	c	0.1	0.333333	0.333333	0.333333	1
0.253732	d	0.1	0.166667	0.416667	0.416667	1
0.200816	e	0.1	0	0.666667	0.333333	1
0.134491	f	0.1	0	0.5	0.5	1
1.41889	a	0.1	1.5	1.5	0	3
1.19914	b	0.1	1.25	1.25	0.5	3
0.98668	c	0.1	1	1	1	3
0.867781	d	0.1	0	2	1	3
0.800214	d	0.1	0.5	1.25	1.25	3
0.616214	e	0.1	0	1.5	1.5	3
3.29784	a	0.1	4	4	0	8
2.82525	b	0.1	3.33333	3.33333	1.33333	8
2.61287	c	0.1	0	5.33333	2.66667	8
2.27256	d	0.1	2.66667	2.66667	2.66667	8
2.05478	e	0.1	1.33333	3.33333	3.33333	8
1.82453	f	0.1	0	4	4	8
0.528807	a	0.2	0.5	0.5	0	1
0.450077	b	0.2	0.416667	0.416667	0.166667	1
0.363046	c	0.2	0.333333	0.333333	0.333333	1
0.255555	d	0.2	0.166667	0.416667	0.416667	1
0.20192	e	0.2	0	0.666667	0.333333	1
0.136002	f	0.2	0	0.5	0.5	1
1.38922	a	0.2	1.5	1.5	0	3
1.18763	b	0.2	1.25	1.25	0.5	3
0.964646	c	0.2	1	1	1	3
0.888452	c	0.2	0	2	1	3
0.7883	d	0.2	0.5	1.25	1.25	3
0.610571	e	0.2	0	1.5	1.5	3
3.24862	a	0.2	4	4	0	8
2.70413	b	0.2	3.33333	3.33333	1.33333	8
2.39427	c	0.2	0	5.33333	2.66667	8
2.17914	d	0.2	2.66667	2.66667	2.66667	8
1.9788	de	0.2	1.33333	3.33333	3.33333	8
1.88189	e	0.2	0	4	4	8
0.526821	a	0.3	0.5	0.5	0	1
0.448857	b	0.3	0.416667	0.416667	0.166667	1
0.363022	c	0.3	0.333333	0.333333	0.333333	1
0.255924	d	0.3	0.166667	0.416667	0.416667	1
0.210361	e	0.3	0	0.666667	0.333333	1
0.139132	f	0.3	0	0.5	0.5	1
1.40015	a	0.3	1.5	1.5	0	3
1.16801	b	0.3	1.25	1.25	0.5	3
0.950698	c	0.3	1	1	1	3
0.878681	c	0.3	0	2	1	3
0.77397	d	0.3	0.5	1.25	1.25	3
0.607306	e	0.3	0	1.5	1.5	3
3.27359	a	0.3	4	4	0	8
2.6327	b	0.3	3.33333	3.33333	1.33333	8
2.61068	b	0.3	0	5.33333	2.66667	8
2.07145	c	0.3	2.66667	2.66667	2.66667	8
1.93553	c	0.3	1.33333	3.33333	3.33333	8
1.82926	c	0.3	0	4	4	8
0.525976	a	0.4	0.5	0.5	0	1
0.447198	b	0.4	0.416667	0.416667	0.166667	1
0.36314	c	0.4	0.333333	0.333333	0.333333	1
0.255179	d	0.4	0.166667	0.416667	0.416667	1
0.213386	e	0.4	0	0.666667	0.333333	1
0.147488	f	0.4	0	0.5	0.5	1
1.36614	a	0.4	1.5	1.5	0	3
1.14739	b	0.4	1.25	1.25	0.5	3
0.929948	c	0.4	1	1	1	3
0.871599	c	0.4	0	2	1	3
0.76925	d	0.4	0.5	1.25	1.25	3
0.636144	e	0.4	0	1.5	1.5	3
3.21897	a	0.4	4	4	0	8
2.61446	b	0.4	3.33333	3.33333	1.33333	8
2.38064	c	0.4	0	5.33333	2.66667	8
1.96813	d	0.4	2.66667	2.66667	2.66667	8
1.81642	de	0.4	1.33333	3.33333	3.33333	8
1.75173	e	0.4	0	4	4	8
0.526471	a	0.5	0.5	0.5	0	1
0.443886	b	0.5	0.416667	0.416667	0.166667	1
0.359658	c	0.5	0.333333	0.333333	0.333333	1
0.257106	d	0.5	0.166667	0.416667	0.416667	1
0.218546	e	0.5	0	0.666667	0.333333	1
0.152155	f	0.5	0	0.5	0.5	1
1.38347	a	0.5	1.5	1.5	0	3
1.12953	b	0.5	1.25	1.25	0.5	3
0.910432	c	0.5	1	1	1	3
0.850205	c	0.5	0	2	1	3
0.764051	d	0.5	0.5	1.25	1.25	3
0.637862	e	0.5	0	1.5	1.5	3
3.19901	a	0.5	4	4	0	8
2.44583	b	0.5	0	5.33333	2.66667	8
2.34496	b	0.5	3.33333	3.33333	1.33333	8
1.91362	c	0.5	2.66667	2.66667	2.66667	8
1.90419	c	0.5	0	4	4	8
1.81816	c	0.5	1.33333	3.33333	3.33333	8
0.522788	a	0.6	0.5	0.5	0	1
0.437539	b	0.6	0.416667	0.416667	0.166667	1
0.355723	c	0.6	0.333333	0.333333	0.333333	1
0.259297	d	0.6	0.166667	0.416667	0.416667	1
0.221315	e	0.6	0	0.666667	0.333333	1
0.159404	f	0.6	0	0.5	0.5	1
1.34555	a	0.6	1.5	1.5	0	3
1.09476	b	0.6	1.25	1.25	0.5	3
0.88983	c	0.6	1	1	1	3
0.837646	c	0.6	0	2	1	3
0.757615	d	0.6	0.5	1.25	1.25	3
0.65876	e	0.6	0	1.5	1.5	3
3.09818	a	0.6	4	4	0	8
2.31328	b	0.6	3.33333	3.33333	1.33333	8
2.26298	b	0.6	0	5.33333	2.66667	8
1.86746	c	0.6	2.66667	2.66667	2.66667	8
1.78608	c	0.6	0	4	4	8
1.78545	c	0.6	1.33333	3.33333	3.33333	8
0.517272	a	0.7	0.5	0.5	0	1
0.430709	b	0.7	0.416667	0.416667	0.166667	1
0.35297	c	0.7	0.333333	0.333333	0.333333	1
0.260149	d	0.7	0.166667	0.416667	0.416667	1
0.225375	e	0.7	0	0.666667	0.333333	1
0.170712	f	0.7	0	0.5	0.5	1
1.32056	a	0.7	1.5	1.5	0	3
1.0526	b	0.7	1.25	1.25	0.5	3
0.863075	c	0.7	1	1	1	3
0.850669	c	0.7	0	2	1	3
0.754785	d	0.7	0.5	1.25	1.25	3
0.6799	e	0.7	0	1.5	1.5	3
2.98189	a	0.7	4	4	0	8
2.24012	b	0.7	0	5.33333	2.66667	8
2.18055	b	0.7	3.33333	3.33333	1.33333	8
1.85882	c	0.7	0	4	4	8
1.82622	c	0.7	2.66667	2.66667	2.66667	8
1.80472	c	0.7	1.33333	3.33333	3.33333	8
0.50932	a	0.8	0.5	0.5	0	1
0.42083	b	0.8	0.416667	0.416667	0.166667	1
0.350111	c	0.8	0.333333	0.333333	0.333333	1
0.267671	d	0.8	0.166667	0.416667	0.416667	1
0.233534	e	0.8	0	0.666667	0.333333	1
0.188665	f	0.8	0	0.5	0.5	1
1.27438	a	0.8	1.5	1.5	0	3
1.01107	b	0.8	1.25	1.25	0.5	3
0.853879	c	0.8	0	2	1	3
0.853192	c	0.8	1	1	1	3
0.770105	d	0.8	0.5	1.25	1.25	3
0.725641	d	0.8	0	1.5	1.5	3
2.86232	a	0.8	4	4	0	8
2.11227	b	0.8	0	5.33333	2.66667	8
2.10769	b	0.8	3.33333	3.33333	1.33333	8
1.91835	c	0.8	0	4	4	8
1.78727	c	0.8	2.66667	2.66667	2.66667	8
1.77448	c	0.8	1.33333	3.33333	3.33333	8
0.490487	a	0.9	0.5	0.5	0	1
0.408451	b	0.9	0.416667	0.416667	0.166667	1
0.349803	c	0.9	0.333333	0.333333	0.333333	1
0.278849	d	0.9	0.166667	0.416667	0.416667	1
0.242619	e	0.9	0	0.666667	0.333333	1
0.210677	f	0.9	0	0.5	0.5	1
1.20404	a	0.9	1.5	1.5	0	3
0.964308	b	0.9	1.25	1.25	0.5	3
0.852063	c	0.9	0	2	1	3
0.846117	c	0.9	1	1	1	3
0.786964	d	0.9	0.5	1.25	1.25	3
0.748154	d	0.9	0	1.5	1.5	3
2.69277	a	0.9	4	4	0	8
2.14048	b	0.9	0	5.33333	2.66667	8
1.99348	c	0.9	0	4	4	8
1.97386	c	0.9	3.33333	3.33333	1.33333	8
1.82862	d	0.9	1.33333	3.33333	3.33333	8
1.77957	d	0.9	2.66667	2.66667	2.66667	8
0.463419	a	1	0.5	0.5	0	1
0.391895	b	1	0.416667	0.416667	0.166667	1
0.353034	c	1	0.333333	0.333333	0.333333	1
0.293787	d	1	0.166667	0.416667	0.416667	1
0.252577	e	1	0	0.666667	0.333333	1
0.240514	e	1	0	0.5	0.5	1
1.13738	a	1	1.5	1.5	0	3
0.903282	b	1	1.25	1.25	0.5	3
0.838613	c	1	1	1	1	3
0.836462	c	1	0	2	1	3
0.803646	c	1	0.5	1.25	1.25	3
0.799811	c	1	0	1.5	1.5	3
2.44288	a	1	4	4	0	8
2.16049	b	1	0	5.33333	2.66667	8
2.02727	c	1	0	4	4	8
1.89056	d	1	3.33333	3.33333	1.33333	8
1.82684	d	1	1.33333	3.33333	3.33333	8
1.77884	d	1	2.66667	2.66667	2.66667	8
0.422964	a	1.1	0.5	0.5	0	1
0.373634	b	1.1	0.416667	0.416667	0.166667	1
0.357865	c	1.1	0.333333	0.333333	0.333333	1
0.315309	d	1.1	0.166667	0.416667	0.416667	1
0.276668	e	1.1	0	0.5	0.5	1
0.264502	e	1.1	0	0.666667	0.333333	1
1.0406	a	1.1	1.5	1.5	0	3
0.868247	b	1.1	1.25	1.25	0.5	3
0.853395	bc	1.1	0	1.5	1.5	3
0.839078	c	1.1	0	2	1	3
0.837347	c	1.1	1	1	1	3
0.826387	c	1.1	0.5	1.25	1.25	3
2.32132	a	1.1	4	4	0	8
2.11489	b	1.1	0	5.33333	2.66667	8
2.11261	b	1.1	0	4	4	8
1.88451	c	1.1	1.33333	3.33333	3.33333	8
1.80231	c	1.1	3.33333	3.33333	1.33333	8
1.77702	c	1.1	2.66667	2.66667	2.66667	8
0.372717	a	1.2	0.5	0.5	0	1
0.365557	b	1.2	0.333333	0.333333	0.333333	1
0.354771	c	1.2	0.416667	0.416667	0.166667	1
0.339004	d	1.2	0.166667	0.416667	0.416667	1
0.316956	e	1.2	0	0.5	0.5	1
0.276963	f	1.2	0	0.666667	0.333333	1
0.935298	a	1.2	1.5	1.5	0	3
0.91499	a	1.2	0	1.5	1.5	3
0.856904	b	1.2	0	2	1	3
0.855071	b	1.2	0.5	1.25	1.25	3
0.844886	b	1.2	1	1	1	3
0.81505	c	1.2	1.25	1.25	0.5	3
2.19437	a	1.2	0	4	4	8
2.10618	a	1.2	0	5.33333	2.66667	8
2.08785	a	1.2	4	4	0	8
1.93274	b	1.2	1.33333	3.33333	3.33333	8
1.78319	c	1.2	2.66667	2.66667	2.66667	8
1.71041	c	1.2	3.33333	3.33333	1.33333	8
0.374115	a	1.3	0.333333	0.333333	0.333333	1
0.361098	b	1.3	0.166667	0.416667	0.416667	1
0.355776	c	1.3	0	0.5	0.5	1
0.335234	d	1.3	0.416667	0.416667	0.166667	1
0.317943	e	1.3	0.5	0.5	0	1
0.289632	f	1.3	0	0.666667	0.333333	1
0.967481	a	1.3	0	1.5	1.5	3
0.884626	b	1.3	0.5	1.25	1.25	3
0.856849	c	1.3	0	2	1	3
0.847352	c	1.3	1	1	1	3
0.819505	d	1.3	1.5	1.5	0	3
0.769872	e	1.3	1.25	1.25	0.5	3
2.29081	a	1.3	0	4	4	8
2.13294	b	1.3	0	5.33333	2.66667	8
1.99292	c	1.3	1.33333	3.33333	3.33333	8
1.91866	cd	1.3	4	4	0	8
1.81458	d	1.3	2.66667	2.66667	2.66667	8
1.64176	e	1.3	3.33333	3.33333	1.33333	8
0.390368	a	1.4	0	0.5	0.5	1
0.381925	a	1.4	0.166667	0.416667	0.416667	1
0.379202	a	1.4	0.333333	0.333333	0.333333	1
0.313942	b	1.4	0.416667	0.416667	0.166667	1
0.30112	c	1.4	0	0.666667	0.333333	1
0.264522	d	1.4	0.5	0.5	0	1
1.03142	a	1.4	0	1.5	1.5	3
0.925262	b	1.4	0.5	1.25	1.25	3
0.864059	c	1.4	0	2	1	3
0.861261	c	1.4	1	1	1	3
0.727339	d	1.4	1.25	1.25	0.5	3
0.704857	d	1.4	1.5	1.5	0	3
2.29178	a	1.4	0	4	4	8
2.12485	b	1.4	0	5.33333	2.66667	8
2.05514	b	1.4	1.33333	3.33333	3.33333	8
1.82104	c	1.4	2.66667	2.66667	2.66667	8
1.7003	c	1.4	4	4	0	8
1.55121	d	1.4	3.33333	3.33333	1.33333	8
0.418846	a	1.5	0	0.5	0.5	1
0.402317	a	1.5	0.166667	0.416667	0.416667	1
0.383487	b	1.5	0.333333	0.333333	0.333333	1
0.310671	c	1.5	0	0.666667	0.333333	1
0.293728	c	1.5	0.416667	0.416667	0.166667	1
0.215109	d	1.5	0.5	0.5	0	1
1.08446	a	1.5	0	1.5	1.5	3
0.961083	b	1.5	0.5	1.25	1.25	3
0.885884	c	1.5	1	1	1	3
0.874264	c	1.5	0	2	1	3
0.691318	d	1.5	1.25	1.25	0.5	3
0.594821	e	1.5	1.5	1.5	0	3
2.54448	a	1.5	0	4	4	8
2.14749	b	1.5	0	5.33333	2.66667	8
2.11269	b	1.5	1.33333	3.33333	3.33333	8
1.88098	c	1.5	2.66667	2.66667	2.66667	8
1.50582	d	1.5	4	4	0	8
1.49704	d	1.5	3.33333	3.33333	1.33333	8
0.442592	a	1.6	0	0.5	0.5	1
0.4157	b	1.6	0.166667	0.416667	0.416667	1
0.383161	c	1.6	0.333333	0.333333	0.333333	1
0.317394	d	1.6	0	0.666667	0.333333	1
0.274139	e	1.6	0.416667	0.416667	0.166667	1
0.171947	f	1.6	0.5	0.5	0	1
1.13541	a	1.6	0	1.5	1.5	3
1.00787	b	1.6	0.5	1.25	1.25	3
0.894424	c	1.6	1	1	1	3
0.887795	c	1.6	0	2	1	3
0.658171	d	1.6	1.25	1.25	0.5	3
0.497651	e	1.6	1.5	1.5	0	3
2.64201	a	1.6	0	4	4	8
2.22714	b	1.6	1.33333	3.33333	3.33333	8
2.11865	b	1.6	0	5.33333	2.66667	8
1.89922	c	1.6	2.66667	2.66667	2.66667	8
1.4388	d	1.6	3.33333	3.33333	1.33333	8
1.29361	d	1.6	4	4	0	8
0.46039	a	1.7	0	0.5	0.5	1
0.422096	b	1.7	0.166667	0.416667	0.416667	1
0.382941	c	1.7	0.333333	0.333333	0.333333	1
0.320608	d	1.7	0	0.666667	0.333333	1
0.256957	e	1.7	0.416667	0.416667	0.166667	1
0.136413	f	1.7	0.5	0.5	0	1
1.19916	a	1.7	0	1.5	1.5	3
1.04273	b	1.7	0.5	1.25	1.25	3
0.91576	c	1.7	1	1	1	3
0.894498	c	1.7	0	2	1	3
0.630252	d	1.7	1.25	1.25	0.5	3
0.403041	e	1.7	1.5	1.5	0	3
2.71585	a	1.7	0	4	4	8
2.28031	b	1.7	1.33333	3.33333	3.33333	8
2.1613	b	1.7	0	5.33333	2.66667	8
1.93131	c	1.7	2.66667	2.66667	2.66667	8
1.39406	d	1.7	3.33333	3.33333	1.33333	8
1.08089	e	1.7	4	4	0	8
0.473896	a	1.8	0	0.5	0.5	1
0.425064	b	1.8	0.166667	0.416667	0.416667	1
0.374416	c	1.8	0.333333	0.333333	0.333333	1
0.324714	d	1.8	0	0.666667	0.333333	1
0.239633	e	1.8	0.416667	0.416667	0.166667	1
0.106143	f	1.8	0.5	0.5	0	1
1.23622	a	1.8	0	1.5	1.5	3
1.08164	b	1.8	0.5	1.25	1.25	3
0.938171	c	1.8	1	1	1	3
0.90043	c	1.8	0	2	1	3
0.608002	d	1.8	1.25	1.25	0.5	3
0.320385	e	1.8	1.5	1.5	0	3
2.89884	a	1.8	0	4	4	8
2.45097	b	1.8	1.33333	3.33333	3.33333	8
2.16011	c	1.8	0	5.33333	2.66667	8
2.01223	c	1.8	2.66667	2.66667	2.66667	8
1.36301	d	1.8	3.33333	3.33333	1.33333	8
0.928467	e	1.8	4	4	0	8
0.485024	a	1.9	0	0.5	0.5	1
0.428763	b	1.9	0.166667	0.416667	0.416667	1
0.369323	c	1.9	0.333333	0.333333	0.333333	1
0.324788	d	1.9	0	0.666667	0.333333	1
0.225263	e	1.9	0.416667	0.416667	0.166667	1
0.0809345	f	1.9	0.5	0.5	0	1
1.30567	a	1.9	0	1.5	1.5	3
1.11395	b	1.9	0.5	1.25	1.25	3
0.956854	c	1.9	1	1	1	3
0.924813	c	1.9	0	2	1	3
0.58813	d	1.9	1.25	1.25	0.5	3
0.251917	e	1.9	1.5	1.5	0	3
2.93394	a	1.9	0	4	4	8
2.44044	b	1.9	1.33333	3.33333	3.33333	8
2.16863	c	1.9	0	5.33333	2.66667	8
2.10565	c	1.9	2.66667	2.66667	2.66667	8
1.33032	d	1.9	3.33333	3.33333	1.33333	8
0.771212	e	1.9	4	4	0	8

[truncated: 1 more sheets: TA_XYY_ComparingEqualWTexperime]
